# Supplementary material for: Source apportionment of PM2.5 and their associated metallic elements by positive matrix factorization at a traffic site in Constantine, Algeria
Source: Springer Nature journal article supplement (doi:10.1007/s11869-022-01241-9), 2022-09-15
Supplement: MOESM2 [file 11869_2022_1241_MOESM2_ESM.xlsx]

## Sheet: Profiles
Factor Profiles (conc. of species) from Base Run #1 (Convergent Run)
		Sea-salt	Industrial emissions	Non-exhaust	Exhaust	Mineral dust
1	PM2.5	5.7995	7.2829	9.3096	6.0815	9.974
1	Na	0.66525	0.10187	0	0	0
1	Mg	0.043967	0.0073355	0.0046574	0.015968	0.032069
1	P	0	0.0057627	0.0087976	0.0043256	0.0082171
1	K	0.094687	0.013319	0.0094812	0.0047778	0.046773
1	Ca	0.19822	0	0.06991	0.2533	0.57767
1	Sr	0.0021654	0.00025276	0.0002923	0.0017848	0.0010173
1	Zr	0.0041576	0.002918	0.0028646	0.0029617	0.00058641
1	Ba	0.04214	0	0	0.057337	0			0.0273384	0.0367793	0.064337	0.0217326
1	Pb	0	0	0.0080946	0.028764	0.0020408
1	Al	0.25673	0.12004	0.099676	0.16212	0.097498			Sea-salt	Industrial emissions	Non-exhaust	Exhaust	Mineral dust
1	Ti	0.003299	0.0032419	0.0013406	0.0040848	0.0062146		Ca/Al	0.772095	0	0.701372	1.56242	5.92494
1	V	8.9098e-05	0.00013999	0	0	0.00030028
1	Cr	0.00024465	0.0038112	0.00013323	0.000227	0.00059013		Ti/Al	0.0128501	0.0270068	0.0134496	0.0251962	0.0637408
1	Mn	0.0003818	0.0010326	0.00073132	0.0011111	0.001599		Mn/Al	0.00148717	0.00860213	0.00733697	0.00685357	0.0164003
1	Fe	0.02247	0.037771	0.019884	0.01727	0.073576		Fe/Al	0.0875239	0.314653	0.199486	0.106526	0.754641
1	Ni	0	0.0012297	0.00094036	0.00019712	0.00017775		Zn/Al	0.00913723	0	0.12968	0	0
1	Cu	0.00025244	0.000417	0.00034076	0	0.00032744		Pb/Al	0	0	0.0812091	0.177424	0.0209317
1	Zn	0.0023458	0	0.012926	0	0		Zn/Pb	#DIV/0!	#DIV/0!	1.59687	0	0
1	Mo	0.00023708	0.0075406	0.0092419	0.012087	0		V/Ni	#DIV/0!	0.113841	0	0	1.68934
1	S	0.0011189	0.066587	0.079397	0.077006	0.0033523		Mn/Fe	0.0169915	0.0273384	0.0367793	0.064337	0.0217326
								Fe/Ca	0.113359	#DIV/0!	0.284423	0.06818	0.127367
Factor Profiles (% of species sum) from Base Run #1 (Convergent Run)								Na/Mg	15.1307	13.8873	0	0	0
								Na/Sr	307.218	403.031	0	0	0
		Factor 1	Factor 2	Factor 3	Factor 4	Factor 5		Sr/Mg	0.0492506	0.0344571	0.0627603	0.111774	0.0317222
1	PM2.5	15.0842	18.9425	24.2138	15.8177	25.9419		K/Fe	4.21393	0.352625	0.476826	0.276653	0.63571
1	Na	86.7205	13.2795	0	0	0		k/Al					0.479733
1	Mg	42.2772	7.05358	4.4784	15.3543	30.8365
1	P	0	21.2622	32.4599	15.9599	30.318
1	K	56.0152	7.87929	5.60892	2.82647	27.6701
1	Ca	18.0348	0	6.36066	23.0461	52.5585
1	Sr	39.2812	4.58517	5.30244	32.377	18.4542
1	Zr	30.8237	21.6335	21.2376	21.9575	4.34754
1	Ba	42.3616	0	0	57.6384	0
1	Pb	0	0	20.8091	73.9446	5.24635
1	Al	34.8788	16.3084	13.5418	22.0253	13.2459
1	Ti	18.1454	17.8314	7.37367	22.4675	34.182
1	V	16.831	26.4447	0	0	56.7242
1	Cr	4.88693	76.1294	2.66129	4.53437	11.788
1	Mn	7.86273	21.2652	15.0607	22.8818	32.9296
1	Fe	13.1426	22.0921	11.63	10.1011	43.0342
1	Ni	0	48.3196	36.9503	7.7456	6.98448
1	Cu	18.872	31.1743	25.4747	0	24.4789
1	Zn	15.3603	0	84.6397	0	0
1	Mo	0.814524	25.9069	31.7519	41.5267	0
1	S	0.491908	29.274	34.9057	33.8546	1.47379
Factor Profiles (% of factor total) from Base Run #1 (Convergent Run)
		Factor 1	Factor 2	Factor 3	Factor 4	Factor 5
1	PM2.5	81.2567	95.1246	96.5896	90.4336	92.13
1	Na	9.32081	1.33056	0	0	0
1	Mg	0.616021	0.0958116	0.0483218	0.237449	0.296222
1	P	0	0.0752687	0.0912774	0.0643229	0.0759015
1	K	1.32666	0.173964	0.09837	0.0710472	0.432043
1	Ca	2.77726	0	0.725335	3.76664	5.33595
1	Sr	0.0303394	0.00330139	0.00303269	0.0265405	0.00939681
1	Zr	0.0582521	0.0381131	0.029721	0.0440413	0.00541668
1	Ba	0.590423	0	0	0.852617	0
1	Pb	0	0	0.0839836	0.427729	0.0188509
1	Al	3.59704	1.56789	1.03416	2.41077	0.90059
1	Ti	0.0462222	0.0423436	0.0139091	0.0607421	0.0574043
1	V	0.00124835	0.00182846	0	0	0.00277369
1	Cr	0.00342779	0.0497795	0.0013823	0.00337555	0.00545104
1	Mn	0.00534939	0.0134872	0.00758764	0.0165224	0.01477
1	Fe	0.314827	0.493341	0.206302	0.25681	0.679623
1	Ni	0	0.0160616	0.00975648	0.00293123	0.00164188
1	Cu	0.00353693	0.00544659	0.00353547	0	0.00302457
1	Zn	0.032867	0	0.134111	0	0
1	Mo	0.00332172	0.0984905	0.0958872	0.179737	0
1	S	0.0156769	0.869717	0.823765	1.1451	0.0309652

## Sheet: Contributions
Factor Contributions (avg = 1) from Base Run #1 (Convergent Run)
		Factor 1	Factor 2	Factor 3	Factor 4	Factor 5
1	2017-03-15	0.93715	1.4984	0.11435	-0.2	0.47951
1	2017-03-18	0.52385	1.1434	2.858	-0.2	0.26622
1	2017-03-21	0.99544	1.1193	2.3837	-0.085067	-0.026211
1	2017-03-24	0.81526	1.8623	1.1277	0.53744	1.6621
1	2017-03-27	0.78304	0.37965	1.5466	0.02531	0.4353
1	2017-03-30	1.1348	0.65938	0.83198	-0.2	5.3051
1	2017-04-05	0.98103	0.95328	1.4495	0.22683	0.31756
1	2017-04-08	0.71112	2.0384	0.38657	0.002102	0.02629
1	2017-04-11	0.25796	0.75311	1.2367	0.27056	0.8706
1	2017-04-14	1.0213	1.1582	2.5707	0.063247	0.67492
1	2017-04-17	1.1165	0.34443	2.7012	0.045225	0.60349
1	2017-04-20	1.8487	1.5917	1.4327	0.026261	0.27075
1	2017-04-23	1.4618	1.3573	1.0976	0.66658	0.55577
1	2017-04-26	1.9763	0.52581	2.3063	0.22356	2.1654
1	2017-04-29	1.1742	0.91238	0.96905	0.25254	0.48131
1	2017-05-05	2.1851	0.7672	1.9837	0.49408	1.3727
1	2017-05-08	1.3608	1.6652	0.7019	0.76625	0.70186
1	2017-05-11	1.3589	1.563	0.86635	0.32125	1.8989
1	2017-05-14	1.4202	1.965	0.74219	0.28068	1.656
1	2017-05-17	2.0926	0.73193	1.9089	0.28978	0.96572
1	2017-05-20	1.3359	1.5556	0.86396	0.87856	0.60757
1	2017-05-23	1.4809	2.1739	1.3083	1.7182	-0.067212
1	2017-05-26	1.3235	1.184	0.58105	1.1752	0.64791
1	2017-06-04	1.6949	1.4638	1.1923	1.2203	0.64
1	2017-06-07	1.1288	0.6624	0.67129	1.3721	0.53894
1	2017-06-19	0.60801	0.26618	2.5335	0.082798	1.3506
1	2017-06-25	0.7492	1.469	1.1391	0.29259	4.2639
1	2017-06-28	1.0655	2.046	1.2757	-0.2	1.1016
1	2017-07-07	1.054	1.9566	0.71997	0.58861	0.74941
1	2017-07-10	0.56699	2.0862	0.17481	0.80526	1.3505
1	2017-07-16	1.4164	0.87679	1.7157	-0.17947	0.49944
1	2017-07-19	2.6392	1.0747	0.87465	1.0534	2.5299
1	2017-07-22	2.2553	1.3368	1.2125	0.78214	4.273
1	2017-07-25	2.3021	2.4626	0.40385	0.50698	0.45765
1	2017-07-28	1.4236	1.6782	0.43323	1.2925	-0.0071414
1	2017-08-03	2.5532	1.3723	0.73031	1.2705	2.0465
1	2017-08-06	3.3523	0.86483	0.48617	1.2684	2.4291
1	2017-08-09	3.9549	0.51984	1.3022	0.95831	4.9371
1	2017-08-12	3.0057	1.9693	0.48436	0.86339	1.3287
1	2017-08-15	3.4636	1.031	0.86107	0.72388	0.65667
1	2017-08-18	0.15934	1.1515	1.7025	-0.00011251	1.9498
1	2017-08-21	-0.15608	1.1172	1.6292	0.13028	1.679
1	2017-08-27	0.1057	-0.036055	1.2073	1.5641	1.9938
1	2017-08-30	-0.2	1.4111	1.253	0.85778	1.939
1	2017-09-05	1.0341	0.49112	0.90837	1.1039	1.583
1	2017-09-08	0.31234	1.5803	1.2149	0.60974	0.25427
1	2017-09-11	0.42517	0.90328	0.24051	1.4741	0.66438
1	2017-09-14	0.71059	1.2001	0.34979	1.0591	1.8876
1	2017-09-17	1.0331	0.9081	1.6755	0.48258	2.2076
1	2017-09-20	0.68132	0.3603	0.98283	0.70023	0.99901
1	2017-09-23	0.55183	1.0662	0.55491	1.3409	2.261
1	2017-09-26	0.4856	1.6144	1.035	0.74748	1.7224
1	2017-09-29	0.5088	1.4314	1.0473	0.66025	0.76331
1	2017-10-05	0.51793	1.6672	0.48331	0.80293	0.66176
1	2017-10-08	0.72921	0.98718	0.98201	0.86858	0.92607
1	2017-10-11	0.68027	1.0374	0.74918	1.1656	1.0979
1	2017-10-14	-0.039521	0.35242	1.4791	1.1052	0.47947
1	2017-10-17	-0.022379	0.24553	2.1811	0.68237	1.2991
1	2017-10-20	0.88274	0.63216	0.99228	2.9001	1.5746
1	2017-10-23	0.07709	-0.2	2.0167	0.56208	1.274
1	2017-11-04	0.040628	-0.16409	1.4919	1.6077	1.5423
1	2017-11-10	0.085167	-0.19811	-0.19126	1.5404	0.73106
1	2017-11-13	0.26406	0.95832	1.0364	1.0262	0.3236
1	2017-11-19	-0.2	1.9166	0.078076	1.2953	0.49822
1	2017-11-25	0.015858	0.63012	1.5035	0.96284	0.76455
1	2017-11-28	0.061548	0.021175	1.6593	0.93622	1.0309
1	2017-12-04	0.51746	0.46225	2.3128	0.82172	0.51477
1	2017-12-07	0.058561	1.2975	1.184	1.0909	0.4635
1	2017-12-10	1.3456	1.2405	1.0868	1.4208	0.31263
1	2017-12-13	1.051	1.1949	0.7524	1.437	0.33626
1	2017-12-16	1.1221	1.5223	1.0653	1.4926	-0.2
1	2017-12-19	1.2599	0.71255	1.4694	1.6694	0.13583
1	2017-12-22	1.0803	1.5763	1.8078	1.116	0.029742
1	2017-12-25	0.33827	0.86636	0.73815	1.8251	0.86499
1	2017-12-28	0.082406	1.6535	0.25041	1.659	0.31853
1	2018-01-03	0.22467	1.022	0.37087	1.8067	0.35138
1	2018-01-06	0.34943	0.88891	0.36664	1.8487	0.48096
1	2018-01-09	0.28235	0.97626	0.23797	1.9026	0.28217
1	2018-01-12	0.4782	-0.059285	0.49506	1.7751	0.41457
1	2018-01-15	0.20102	1.1394	-0.2	1.6911	0.31277
1	2018-01-18	0.32572	0.80309	-0.2	2.031	0.3836
1	2018-01-21	0.39137	0.35355	0.60927	1.5367	0.7286
1	2018-01-24	1.3682	0.64605	0.47797	2.1517	0.47974
1	2018-01-27	1.4218	-0.15233	-0.17412	2.356	0.50585
1	2018-01-30	1.329	-0.2	0.7369	2.2032	0.40507
1	2018-02-05	0.77747	-0.14064	-0.049975	1.3658	0.26728
1	2018-02-08	1.1813	0.080923	-0.053423	2.4706	0.41848
1	2018-02-11	1.0073	1.0197	-0.05395	1.9838	0.13387
1	2018-02-14	0.96775	-0.023749	1.1387	1.4658	1.0745
1	2018-02-17	0.92064	0.95505	0.57306	1.634	0.054568
1	2018-02-20	1.2785	1.1944	0.35167	1.5977	0.10355
1	2018-02-23	1.3466	0.90795	1.078	1.6581	0.071953
1	2018-02-26	1.2241	1.0547	0.44765	1.8229	0.5492
1	2018-03-04	1.7405	0.89931	0.67116	1.6301	1.1145

## Sheet: Residuals
Residuals from Base Run #1 (Convergent Run)
Run	Date_Time	PM2.5	Na	Mg	P	K	Ca	Sr	Zr	Ba	Pb	Al	Ti	V	Cr	Mn	Fe	Ni	Cu	Zn	Mo	S
1	2017-03-15	-4.07	-0.05485	0.01208	0.005458	0.08575	-0.07237	0.0002592	0.003892	-0.00467	-0.0005983	0.4276	0.001125	0.0001065	-0.001698	0.004076	0.12	0.00616	0.004531	0.03538	-5.231e-05	0.09607
1	2017-03-18	-1.936	0.09018	-0.01324	-0.01062	0.0143	0.06719	-5.964e-05	0.001172	-7.522e-05	0.02745	0.08263	-0.0002048	8.27e-06	0.0005516	-0.000209	0.07324	-0.00058	0.0001559	0.02187	-0.001307	-0.06822
1	2017-03-21	11.63	-0.01444	-0.001405	-0.006003	-0.0139	-0.01436	-0.0004487	-0.0001171	0.009584	-0.001144	0.02979	0.003512	0.0007892	-0.0004197	0.0004173	0.08809	0.0007238	0.004191	0.008805	-0.001676	-0.06955
1	2017-03-24	27.04	-0.01874	0.06685	0.05123	-0.01103	0.0672	0.002248	0.003089	-0.01024	0.002174	0.02189	0.00225	-0.0001601	0.0008296	-0.0008115	-0.01014	-0.0001159	0.004178	-0.0008698	0.001917	-0.1108
1	2017-03-27	62.34	0.0567	0.01857	0.01575	0.02185	0.282	0.002409	-0.001026	-0.004588	0.01664	0.009998	-0.001719	-1.332e-05	5.092e-05	-0.0001862	-0.01585	0.0002127	0.0002787	-0.004328	0.008284	0.02247
1	2017-03-30	-22.27	-0.02023	0.1125	-0.004461	-0.04128	0.474	0.005707	0.003263	-0.002144	0.0001505	0.3124	0.001551	-0.0006151	0.0008476	0.0009255	-0.03855	0.005615	-0.0001156	0.001443	-0.001432	0.4386
1	2017-04-05	3.165	0.05929	0.03284	0.02419	0.0006646	0.02658	0.002491	0.003654	-0.01084	-0.0003241	0.03288	0.0004746	-4.539e-05	-0.0006442	8.354e-05	-0.005603	0.0002263	0.0009955	-0.005165	0.01173	0.1406
1	2017-04-08	22.25	0.01422	0.006437	0.01719	0.007019	-0.008827	0.001277	-0.003302	-0.0021	4.657e-05	0.06702	-0.0008982	0.0001343	-0.001014	0.0002379	-0.01769	-8.617e-05	0.005849	-0.0002962	0.01026	0.06178
1	2017-04-11	51.99	0.4125	0.009102	-0.01312	-0.004806	0.03849	1.064e-05	0.00779	-0.002985	0.009372	0.2893	-0.001725	0.0001088	-0.0003822	-0.0006759	0.01476	0.00134	9.235e-05	-0.002146	0.01532	0.01967
1	2017-04-14	3.923	0.05374	0.01473	0.009763	-0.0201	0.8856	0.0004779	-0.0002651	-0.002386	0.06503	-0.00826	0.0002069	-4.998e-05	0.0001255	-6.776e-05	0.004683	0.0003653	0.01091	-0.002312	-0.003427	0.001676
1	2017-04-17	10.48	0.0033	0.0002958	0.02791	-0.04197	0.8289	0.0003796	0.0002442	0.01345	-0.003715	0.0026	0.001053	-3.21e-05	6.376e-05	0.0002625	0.04565	-0.0002078	0.0003875	0.02092	-0.003993	0.03012
1	2017-04-20	4.7	0.07158	-0.02657	0.01459	-0.001863	0.135	-0.0003286	0.00473	0.03663	-0.001133	0.1068	-0.002288	3.212e-05	-0.001134	0.0001686	0.00196	0.0005794	0.003571	-0.003096	0.006969	-0.002574
1	2017-04-23	43.02	0.09186	-0.00433	0.001015	0.0144	0.3883	-0.001248	0.0006806	0.008352	0.001189	0.0896	-0.001525	-5.017e-05	0.0007903	-0.0003156	0.0117	-8.643e-05	0.00184	-0.0001827	0.0007916	-0.03792
1	2017-04-26	38.19	-0.01007	0.06875	-0.0004045	-0.01025	0.2873	0.000733	-0.002907	0.001935	0.05279	-0.006727	0.002485	-0.0001245	0.001028	-0.0005937	0.01255	-0.0004448	-6.358e-05	0.02088	-0.003561	0.07612
1	2017-04-29	27.87	0.1073	0.007095	0.007562	-0.01193	-0.05552	-0.0006834	0.004671	-0.003018	-0.001237	0.181	0.001188	-1.246e-05	-0.0008994	0.0004468	0.01872	0.0001202	-0.0002504	-0.002744	0.00895	0.02226
1	2017-05-05	29.56	0.1766	0.007686	0.004539	0.01779	0.2153	-0.001613	0.0004391	-0.003278	0.002041	0.09044	-0.0004818	-8.423e-05	0.0004618	-0.0002403	0.03214	-0.0004253	0.0001869	0.0005569	0.0006961	-0.01042
1	2017-05-08	33.73	0.1988	-0.01027	-0.007404	-0.01971	0.1373	-0.001352	0.0002024	0.02989	-0.0007443	0.2325	-0.0006152	8.777e-05	-0.0004563	-2.252e-05	0.01905	2.9e-06	-0.0001338	0.0002192	0.002156	-0.006202
1	2017-05-11	45.89	-0.09078	0.032	0.0256	-0.09164	-0.08337	-0.0005273	0.001058	0.02134	-0.002437	0.08276	0.0002928	0.0003934	-0.0009897	-0.0004185	0.002903	-0.0001707	-0.0001982	-0.0003694	0.00384	0.08766
1	2017-05-14	22.73	-0.05073	0.01393	-0.002363	-0.08692	0.1266	-0.0008754	0.000484	0.02326	-0.001404	0.05739	0.0001943	-8.628e-06	-0.0003558	-0.0005369	0.1067	-0.0002345	0.01507	0.0001784	0.001022	0.07045
1	2017-05-17	-14.22	-0.09518	0.01627	0.01288	-0.006141	0.07991	0.0002669	0.0008624	0.01642	-0.001447	-0.07305	-0.003559	8.013e-06	0.000168	4.593e-05	0.1366	-2.92e-05	-0.0002673	0.0007198	0.00951	-0.08285
1	2017-05-20	24.14	0.07752	0.007064	0.003181	-0.01537	-0.06252	-0.0009127	0.002431	0.009201	-0.003202	0.04052	0.003566	0.0001024	-0.001628	-0.000297	-0.002259	0.0008278	0.007433	-0.001612	0.005273	0.1135
1	2017-05-23	22.58	0.09913	0.03	0.09804	-0.01188	-0.0586	-0.0009227	-0.002136	0.03743	0.01154	-0.1417	0.04166	0.0004272	0.0003695	0.04363	5.233	1.837e-05	0.002216	0.03697	-0.01638	0.004244
1	2017-05-26	45.62	0.1004	0.0134	0.008913	-0.01661	-0.1821	-0.001128	0.00699	0.001577	0.00373	0.04404	-0.001518	0.0003701	-0.0006704	0.000196	0.01966	-0.0002781	0.01425	-0.0004007	-0.0009132	0.0778
1	2017-06-04	17.81	0.05075	0.01481	0.003313	-0.02733	0.02905	-0.0007443	0.0004268	0.0133	0.01164	-0.005632	0.001022	-2.725e-05	0.002096	-0.0005027	0.01265	-0.0001144	0.0005137	0.002528	-0.007112	-0.1451
1	2017-06-07	2.972	0.3788	-0.006793	0.01075	-0.01766	-0.1117	-0.001249	0.003651	0.006032	-0.001618	0.1738	-0.001135	0.0001218	-0.000761	0.0002664	0.01169	0.000747	0.01434	-0.001678	0.00155	0.09903
1	2017-06-19	3.289	0.02311	0.0376	0.001165	-0.02192	-0.01661	0.0008032	0.004635	-0.003754	0.00457	0.01928	-0.0008787	0.0001287	0.0001649	-0.0001656	-0.03565	-0.0007738	0.002338	0.001294	0.001149	0.1215
1	2017-06-25	-36.99	0.1658	0.06192	-0.007947	-0.01907	0.1907	0.0003277	0.006408	-0.008481	0.01468	0.3937	0.01328	-1.578e-05	0.0002734	0.0002343	0.08431	-0.0005074	0.0007956	-0.0005327	0.007222	-0.08126
1	2017-06-28	78.34	0.08769	0.04702	-0.0005943	0.03146	0.04044	0.001734	0.004279	-0.005644	0.02189	0.0009498	-0.002848	0.0001155	-0.000857	-0.0001338	-0.05116	-1.797e-05	0.00342	-0.002532	0.005195	0.05024
1	2017-07-07	-5.056	0.0008233	0.004544	-0.00123	0.06159	-0.05849	-0.0006862	0.005047	-0.01194	0.008909	0.115	-8.829e-05	-7.651e-05	0.001252	0.0006212	0.03052	-0.0003759	0.005665	-0.0001749	-0.0005994	-0.09026
1	2017-07-10	51.05	0.2545	0.01882	0.00208	-0.0381	0.135	-0.0003344	0.00874	-0.00716	0.0002751	0.1938	0.001201	0.0005366	-0.001913	0.000128	-0.008243	0.000749	0.0001254	-9.179e-05	0.003007	-0.03307
1	2017-07-16	69.4	-0.1073	0.008939	-0.009534	-0.02031	0.675	0.001897	-0.0007376	-0.0008258	0.0214	0.007954	-3.978e-05	-3.483e-05	0.001321	-0.0002719	0.003526	0.001068	0.0002004	0.01814	-0.004415	-0.04061
1	2017-07-19	55.85	-0.171	-0.01075	0.001096	0.03074	0.1322	-0.001012	0.0008456	0.05203	-0.0001615	0.06073	0.004528	-0.0001671	0.0006192	-6.773e-05	0.03459	5.77e-05	0.004641	0.0008554	-0.00229	-0.04934
1	2017-07-22	18.04	0.1028	0.04356	0.03822	-0.09108	-0.3608	0.0009016	-0.007434	0.05252	0.001513	0.1078	0.00973	0.0005016	0.000932	-7.924e-05	0.06145	0.00073	-0.0003156	0.00253	-0.00433	-0.03886
1	2017-07-25	11.24	0.01169	-0.02649	0.008334	0.06199	-0.1176	-0.0001183	0.001272	0.1178	-0.0004217	0.0659	0.002896	0.0005455	-0.002145	0.001379	0.01131	0.004489	0.002205	-0.0005301	-0.0006927	0.01315
1	2017-07-28	-7.133	0.1612	0.004338	-0.0001042	-0.03554	-0.02191	-0.0001828	0.002555	0.04308	0.003147	-0.01281	0.001873	4.065e-05	0.0003665	-0.0002449	0.01491	0.000165	-0.0003925	0.0006701	-0.007539	0.01595
1	2017-08-03	72.77	0.06322	-0.01947	-0.007799	0.2364	-0.2896	-0.0007474	0.00139	0.1482	0.01629	0.1258	0.02602	0.000172	0.0007017	0.001284	0.03069	0.004525	-0.0002115	0.001442	-0.004305	-0.0589
1	2017-08-06	33.27	-0.2454	0.008338	-0.006536	-0.01295	-0.1209	-0.001203	-0.0005487	0.1019	-0.003772	0.04293	0.004594	0.0003739	-0.0006655	0.0002622	0.02159	0.0001955	0.002028	-0.0006878	0.001601	0.05558
1	2017-08-09	-13.81	-0.8386	-0.0139	-0.002781	-0.06627	-0.6133	-0.003234	-0.004291	0.03214	-0.00101	-0.07747	0.008019	-0.0001154	0.0003516	0.00107	0.03333	-1.67e-05	-0.0008174	0.002256	0.002063	-0.05801
1	2017-08-12	-20.37	-0.2586	0.03806	-0.006557	-0.02121	-0.2414	0.0001774	0.0008734	0.1361	-0.0005509	0.05005	0.007626	6.869e-05	-0.0009703	0.001335	0.0813	0.003194	-0.0006408	0.0002035	-0.000553	0.3568
1	2017-08-15	19.5	0.03069	0.08036	0.002471	0.1055	-0.1098	0.001723	0.001767	0.2547	-0.003012	0.04884	0.008728	-2.073e-05	-0.0007725	0.0006927	-0.008979	0.000357	-0.00055	-0.001929	0.006682	-0.01214
1	2017-08-18	-1.901	-0.01914	0.003432	-0.001776	0.02168	-0.2299	0.001444	0.0002085	0.1312	-0.00205	0.04971	3.203e-05	0.000882	0.000322	0.0001276	0.01026	-0.0006134	-0.0003783	0.00177	0.004843	0.03648
1	2017-08-21	9.941	-0.0004018	0.01021	0.002997	-0.004023	-0.04198	0.0005146	3.22e-05	0.07281	-0.002826	0.006678	4.44e-05	6.242e-06	1.161e-06	-3.716e-05	-0.0241	0.0003034	-0.0005738	0.0008279	0.0041	-0.0229
1	2017-08-27	21.06	-0.0002893	0.01068	0.02508	0.02593	-0.1513	-0.0002863	-0.0004163	-0.0002201	0.01463	-0.04539	-0.001388	-3.581e-05	0.005402	-0.0001809	-0.009034	-2.91e-05	0.0004789	-0.0002982	-0.0004609	-0.02863
1	2017-08-30	38.03	-0.001085	-0.001294	0.006	0.002101	0.1059	-0.0004875	-0.0004018	-0.002707	0.02243	0.009763	0.04132	0.0008927	0.003168	-0.0004184	-0.01285	-0.0001659	0.0001261	-0.0007732	-0.0009251	0.04308
1	2017-09-05	13.15	0.0771	-0.003576	0.008826	0.0547	-0.08413	5.036e-05	-0.001678	0.132	-0.001341	-0.1398	0.000436	3.829e-05	-0.0001397	0.0002336	-0.01511	6.859e-05	-5.841e-05	-0.0006576	0.004615	0.0571
1	2017-09-08	-4.059	0.01511	-0.01181	0.01647	0.1126	1.364	0.000977	-0.002021	0.02288	-0.004142	-0.05729	0.0007834	0.0001321	0.0009693	0.0003738	-0.01347	-0.0004933	0.001018	0.005095	-0.001354	0.1139
1	2017-09-11	39.75	0.02423	-0.01848	0.005762	0.02368	0.2894	0.002757	8.64e-05	-0.005784	-0.005809	-0.06589	0.001426	-5.35e-05	-0.0005897	0.0002472	0.01418	0.0006062	0.0004915	-0.0002234	0.00213	0.1946
1	2017-09-14	41.27	0.09601	-0.01316	-0.00138	0.02104	0.6569	0.004079	-0.003109	0.02133	-0.000946	-0.1292	0.001866	-5.12e-05	0.0005938	-0.0002567	-0.0116	0.000522	0.0001979	0.0001586	0.002687	0.2369
1	2017-09-17	15.62	0.04634	0.001616	0.006309	0.02611	-0.008976	0.001274	-0.002069	0.1426	-0.0004492	-0.1887	-0.001687	9.625e-05	0.001257	-0.0001757	-0.01752	-0.0005775	0.0007533	0.003896	0.002072	0.1567
1	2017-09-20	0.411	0.07573	-0.01616	0.01294	0.03289	-0.07155	-0.0001883	-0.002169	0.03725	-0.004848	-0.04634	0.00187	-3.671e-05	-0.0002918	0.001069	0.0541	0.000688	0.001355	-0.001667	0.008338	0.2426
1	2017-09-23	33.57	0.02376	-0.01221	0.01096	0.02711	0.216	-0.0006525	-0.001657	0.01872	0.07606	-0.1084	0.002398	-0.0001461	0.00122	-0.0003958	0.08108	-0.0002141	0.001287	0.0002268	-0.002953	0.1027
1	2017-09-26	30.42	0.07278	-0.02601	0.001967	0.06234	0.3903	-0.0005927	-0.001968	0.06552	0.002519	-0.0587	0.0006214	-3.051e-05	-0.0001242	5.401e-05	0.03965	0.0002445	0.001059	-0.0002419	-0.0007744	0.05638
1	2017-09-29	26.23	0.001827	-0.0135	-0.0007205	0.04913	0.0931	0.0004393	-0.0009393	0.07603	0.001195	-0.08934	0.0007657	0.0001731	0.0009997	-0.0002799	-0.03173	-4.931e-05	0.001021	0.0009769	0.001458	0.008613
1	2017-10-05	39.09	0.04749	-0.0197	-0.003565	0.06215	0.1173	0.0001768	-0.0008289	0.06107	0.0007663	-0.05962	-0.001609	0.0001972	-9.988e-06	-0.0002371	0.002837	-0.000162	0.002057	1.745e-05	0.001823	0.1345
1	2017-10-08	21.69	-0.01056	-0.00791	-0.002782	0.04228	0.0561	0.0003938	-0.001655	0.02592	-0.003535	-0.1217	-0.0009657	2.066e-05	-0.000262	0.0002097	-0.009003	0.0008433	0.001749	-0.0002951	0.002637	0.05324
1	2017-10-11	25.88	-0.03727	0.003348	0.0005089	0.03118	0.4523	0.0006472	-0.0008919	0.029	-0.003379	-0.1392	-0.002187	0.0001192	0.001408	-0.0004668	-0.0379	-6.304e-05	0.001651	0.01585	0.00135	0.06257
1	2017-10-14	25.38	0.0002231	-0.007289	0.00373	0.002988	-0.1742	-0.0005824	0.001464	0.02186	0.007772	0.04868	0.002915	0.000281	-0.0003291	0.001029	0.0312	0.005636	0.01695	-0.002092	0.001093	-0.02893
1	2017-10-17	12.17	-0.0002828	-0.004632	-0.002843	0.02376	0.1398	-7.86e-05	5.231e-06	0.0008341	0.05395	0.02067	-0.001642	5.856e-05	0.0001414	-0.0003308	-0.02457	-0.0003274	0.000509	0.002828	-0.0008155	0.1049
1	2017-10-20	-8.841	-0.04539	0.05577	0.07084	0.1261	-0.4477	7.297e-05	0.009372	-0.01211	-0.008971	0.1935	0.002834	-5.122e-05	-0.0003631	0.002186	0.04967	0.004157	0.002071	-0.0009205	0.03169	0.1283
1	2017-10-23	39.77	-0.0005056	0.02016	0.004745	0.02323	-0.1725	8.933e-05	0.002382	-0.004095	0.001854	0.03313	-0.001166	3.052e-05	-1.598e-05	0.0004217	-0.02397	0.0003029	0.0007321	-0.007171	0.007867	0.04089
1	2017-11-04	43.78	-0.0004413	0.001011	-0.002724	0.03176	-0.2973	-0.0001256	0.0008547	0.005878	-0.0006208	0.04724	0.00145	-2.655e-05	-2.201e-05	-0.0003678	0.04319	0.0002828	0.0003696	-0.00197	-0.002417	-0.01448
1	2017-11-10	32.83	0.0001195	-0.001354	0.01582	-0.001905	-0.4552	-0.0005496	0.005931	0.01313	-0.009605	0.1554	0.0002368	-1.099e-05	-1.162e-05	0.001038	0.0174	0.001701	0.0003349	-0.002133	0.01286	0.04403
1	2017-11-13	6.115	-0.01396	0.02437	0.007664	0.05799	0.01804	-0.0003432	5.458e-05	0.001394	0.003572	-0.03648	0.0003291	-1.22e-05	0.001922	6.189e-05	-0.01745	-0.0001769	-0.000132	0.001424	-0.0007777	-0.07022
1	2017-11-19	-3.96	-0.0007785	-0.001806	0.00461	0.001712	0.03344	8.821e-05	0.0008729	-0.005114	0.006555	0.01032	-0.001129	3.844e-05	0.0005747	-7.918e-05	-0.01874	0.003006	3.351e-05	-3.007e-06	-0.001293	-0.01263
1	2017-11-25	29.67	0.005369	0.01062	0.0004591	-0.01591	0.4771	-0.0006282	-0.0004075	0.003999	0.001726	0.03559	0.00236	-3.744e-05	0.006638	0.0005679	0.05534	-1.481e-05	0.0001099	0.002562	-0.003953	-0.06865
1	2017-11-28	-3.973	0.001426	-0.001041	-0.003545	-0.02829	-0.07972	-0.001356	0.001114	-0.004757	0.002301	0.05023	0.003667	4.357e-05	-8.56e-05	0.0005133	0.06985	0.0002837	0.0002696	-0.003175	0.002561	-0.004424
1	2017-12-04	-15.88	-0.04273	0.0008476	-0.004911	0.02966	-0.07829	0.0008064	-0.0004935	0.06159	-0.005383	-0.04161	0.005308	-2.803e-05	0.0001499	0.001199	0.1179	-8.631e-05	0.0002123	0.008971	-0.0002983	-0.06035
1	2017-12-07	-11.77	-0.006866	0.02639	-0.0068	0.001472	-0.08482	-0.0002071	-0.001572	0.01665	0.04528	-0.005101	-0.00127	1.937e-05	-1.757e-05	0.0001544	0.02132	0.0008533	0.0001768	0.001396	-0.003828	0.02384
1	2017-12-10	0.5968	-0.07352	0.0183	-0.000305	0.01692	0.2234	-0.0001776	-0.0009277	0.007855	0.004166	-0.06564	-0.001588	-5.285e-05	0.002265	-0.0001965	0.005163	0.0001139	0.0002178	0.0009973	-0.004922	-0.03074
1	2017-12-13	-2.27	-0.09135	0.02011	-0.0006936	0.0005557	-0.1524	-5.146e-05	0.0006795	0.007358	0.01026	0.02708	0.0001256	9.283e-05	0.001181	-6.434e-05	0.004386	-0.0004757	-5.145e-05	0.001948	-0.002517	-0.02729
1	2017-12-16	-10.27	-0.1198	0.03653	-0.003554	-0.01636	-0.1248	0.001392	0.0005292	0.06466	-0.0006627	0.01184	0.004604	3.2e-06	0.001674	7.335e-05	0.05708	-0.0006899	-0.0001182	0.007721	-0.005265	-0.02809
1	2017-12-19	-4.286	-0.04884	0.03252	-0.001063	0.009203	-0.1513	0.0004769	0.0008289	-0.01847	0.01744	-0.04209	0.000653	1.305e-05	-0.000328	-6.426e-05	0.009723	0.0003349	0.0002211	-0.001861	-0.001748	0.02258
1	2017-12-22	-12.09	-0.01194	0.02593	0.004575	0.1342	0.09094	0.002035	-0.001409	-0.01796	0.01696	-0.1096	-0.0009567	-4.958e-05	0.003272	-0.0006207	0.01169	0.0005664	0.002773	-0.0006888	-0.007949	0.06909
1	2017-12-25	-8.947	0.01929	0.008429	-0.01238	-0.0113	0.1043	0.0001457	0.001058	-0.01859	0.0146	-0.02614	-0.000551	-3.928e-05	0.0239	0.0008154	0.06711	0.01168	0.0008844	9.264e-05	0.0005457	-0.04346
1	2017-12-28	-5.607	-0.004404	0.01864	0.001948	-0.002323	0.3177	0.0001043	0.000719	-0.00735	-0.005002	0.003362	0.000751	-7.888e-05	0.002878	-0.0001997	0.0166	0.001035	-0.0002378	-1.667e-05	-0.001718	-0.09271
1	2018-01-03	3.182	0.03697	0.008876	0.003272	-0.01063	-0.0687	-8.232e-05	0.001371	-0.01823	0.02695	0.005484	0.0007872	2.776e-05	-0.0008202	-5.274e-05	0.01433	0.0006548	-5.749e-05	-0.0002136	-0.0007197	-0.04858
1	2018-01-06	0.05739	-0.005696	0.02591	-0.003885	-0.01119	0.411	0.0009901	0.0003689	0.001704	-0.01102	0.0235	0.0004763	-4.209e-05	0.001711	-8.672e-05	0.009868	-0.0001217	-0.000239	0.0003111	-0.001778	-0.02534
1	2018-01-09	21.07	-0.01621	0.008444	-0.005123	0.006241	0.05998	9.436e-06	0.0001428	-0.01949	0.04022	0.05248	0.00162	-3.752e-05	0.001466	4.488e-05	0.003434	-0.0001369	-7.37e-05	3.57e-05	-0.001141	-0.03834
1	2018-01-12	-5.161	0.04094	-0.007375	0.006168	-0.003482	0.04168	-0.0002956	0.002847	-0.02026	-0.004954	0.04081	0.000402	1.044e-05	-1.685e-05	0.0003802	0.004223	0.001067	-0.0002043	-0.000236	0.00422	0.009295
1	2018-01-15	36.58	0.01073	-0.004232	-0.001064	-0.001778	-0.009937	4.937e-06	0.001608	-0.01078	0.05484	0.08785	-0.0009427	1.601e-05	0.0001034	-6.493e-06	0.006895	-0.0002361	0.0001442	-0.0002106	0.002652	-0.003098
1	2018-01-18	28.38	0.03681	0.002236	-0.00368	-0.006673	0.006195	3.27e-05	0.001597	-0.003941	-0.006786	0.03639	-8.472e-05	0.000258	-0.0005538	0.000139	-0.001912	0.0001559	-2.231e-05	-0.000449	0.001096	0.00772
1	2018-01-21	-4.688	0.02878	0.007989	-0.0004412	-0.008628	1.959	0.0004758	-0.0006952	-0.01292	0.004238	0.03334	-0.001379	0.0001263	-6.874e-05	0.0001182	-0.008658	0.0004747	-0.0003839	0.02041	0.001898	-0.004804
1	2018-01-24	9.595	-0.05034	0.004694	-0.002844	0.01427	0.4099	0.002002	-0.003388	0.05133	0.02437	-0.09571	-0.001875	7.002e-06	0.002189	-0.0005021	-0.01808	-8.958e-05	0.001518	0.001472	-0.004164	-0.02463
1	2018-01-27	-6.27	-0.06932	-0.008284	0.008935	0.02036	0.008471	0.001655	0.0009627	0.05739	-0.02786	-0.05733	-0.000326	2.711e-05	-1.464e-05	5.659e-05	-0.01402	0.001286	0.001006	-1.567e-05	0.005682	-0.002513
1	2018-01-30	6.511	0.006348	-0.01016	-5.915e-05	0.04438	0.4258	0.001188	-0.001799	0.02819	0.03804	-0.04746	-0.002385	3.229e-05	-1.684e-05	-0.0003799	-0.01854	0.0004725	0.00112	-0.001148	-0.004653	0.03892
1	2018-02-05	35.13	-0.04091	-0.005936	-0.001771	-0.01771	0.5851	0.002187	0.001661	-0.0006192	0.03566	0.02271	0.000147	9.504e-06	3.083e-05	-0.0003244	0.002852	-1.75e-05	0.0009591	0.0001583	-0.0007782	0.1338
1	2018-02-08	5.379	0.1313	-0.02188	0.008141	0.1521	0.2932	0.001131	0.0009531	-0.06015	0.002713	-0.0016	-0.002772	-9.559e-06	-4.541e-05	-0.0001255	0.01324	0.001403	0.0009172	-5.21e-05	0.002841	-0.01054
1	2018-02-11	20.14	-0.1166	0.00423	0.003422	0.03967	0.9804	0.002137	0.0004589	-0.01321	-0.004365	-0.003609	-0.0008573	-5.032e-06	0.0007838	-0.0001413	-0.01507	-0.000105	9.569e-05	0.09644	0.0007721	0.03995
1	2018-02-14	18.42	-0.03518	-0.007269	-0.001207	0.0008111	0.6586	0.002187	0.0006734	-0.005055	-0.006148	-0.0001889	0.0008265	2.476e-05	0.004048	-0.0005929	-0.02407	-7.013e-05	0.0001544	0.02233	0.002157	0.04853
1	2018-02-17	1.853	-0.0978	0.001895	-0.001205	0.03123	0.6736	0.001657	0.0001372	-0.01362	-0.0006923	0.004287	-0.0002089	-1.937e-05	0.001581	0.0001381	-0.007364	-0.0001973	6.726e-05	0.000424	1.12e-06	-0.04123
1	2018-02-20	-7.676	-0.1772	0.00324	-0.01016	0.04731	0.764	0.001596	-0.0007021	-0.003264	-0.004293	0.07011	-0.0004039	-2.215e-05	0.001121	2.143e-06	0.001269	-6.592e-05	-3.631e-05	0.000311	0.004748	-0.02676
1	2018-02-23	-12.86	-0.1184	-0.0007595	-0.006095	0.0645	0.4741	0.001549	-0.002228	-0.01052	-0.002218	-0.002473	-0.0002954	-1.951e-05	0.001937	0.0002387	-0.01837	-0.0001296	6.223e-05	0.002527	-0.0008325	0.03853
1	2018-02-26	7.559	-0.09916	-0.004469	-0.01007	0.04341	0.8715	0.001363	-0.001048	-0.01989	0.00653	0.05967	0.0014	4.841e-05	0.0008931	-0.000418	-0.02366	-0.0001592	0.0007851	0.0004355	0.001573	0.03401
1	2018-03-04	20.65	-0.241	0.002864	-0.0119	0.06041	0.5656	0.001803	-0.00143	0.0172	-0.007989	0.09138	0.002049	-7.525e-05	0.001391	-0.0001198	-0.007902	-0.0001541	-0.0002519	0.001481	0.004495	-0.01481
Scaled Residuals from Base Run #1 (Convergent Run)
Run	Date_Time	PM2.5	Na	Mg	P	K	Ca	Sr	Zr	Ba	Pb	Al	Ti	V	Cr	Mn	Fe	Ni	Cu	Zn	Mo	S	Q(true)/Qexp
1	2017-03-15	-0.512	-0.506	1.045	0.885	2.623	-1.383	0.609	2.13	-1.304	-0.862	1.604	0.65	1.297	-2.509	1.355	1.723	1.7	1.801	1.891	-0.034	1.894	3.69579
1	2017-03-18	-0.111	1.081	-2.387	-1.637	0.799	0.943	-0.188	0.541	-0.043	2.015	0.852	-0.136	0.186	0.663	-0.396	2.421	-1.096	0.19	2.425	-0.277	-1.276	2.44785
1	2017-03-21	0.531	-0.126	-0.157	-0.944	-0.787	-0.305	-1.191	-0.056	1.361	-0.486	0.303	1.773	1.736	-0.638	0.771	1.49	1.116	1.63	1.399	-0.399	-1.378	1.77167
1	2017-03-24	0.779	-0.175	2.428	1.236	-0.403	0.319	2.008	1.163	-1.241	0.48	0.177	0.597	-1.585	0.589	-0.979	-0.291	-0.213	1.525	-0.371	0.386	-1.443	1.90247
1	2017-03-27	1.512	0.612	1.599	2.061	1.059	2.339	1.561	-0.844	-1.01	1.801	0.141	-1.608	-0.366	0.155	-0.513	-1.323	0.639	0.474	-1.646	2.129	0.457	2.82009
1	2017-03-30	-0.984	-0.168	0.74	-0.481	-0.832	0.279	0.931	1.469	-0.413	0.083	1.643	0.252	-1.205	0.825	0.563	-0.618	1.553	-0.104	0.646	-1.047	1.571	1.37751
1	2017-04-05	0.2	0.488	2.114	1.367	0.032	0.314	1.381	1.568	-1.65	-0.116	0.35	0.269	-1.109	-1.168	0.168	-0.343	0.527	0.987	-2.162	2.216	2.139	2.49664
1	2017-04-08	1.059	0.136	0.774	2.329	0.432	-0.332	1.224	-1.633	-0.493	0.088	0.81	-0.674	1.819	-0.964	0.53	-1.379	-0.206	1.851	-0.306	1.163	1.142	1.98912
1	2017-04-11	1.382	2.078	0.947	-2.282	-0.374	0.343	0.028	1.631	-0.832	2.157	1.353	-1.163	1.449	-0.77	-1.579	0.69	2.455	0.174	-0.988	1.427	0.388	3.00094
1	2017-04-14	0.171	0.421	0.955	1.125	-0.896	1.176	0.702	-0.115	-0.357	1.652	-0.075	0.09	-0.816	0.15	-0.099	0.18	0.561	0.634	-0.462	-0.759	0.028	0.790483
1	2017-04-17	0.442	0.028	0.023	1.341	-2.258	1.727	0.579	0.115	1.416	-1.195	0.025	0.519	-0.717	0.177	0.428	1.662	-0.482	0.445	2.384	-1.091	0.515	1.95512
1	2017-04-20	0.233	0.326	-2.154	1.812	-0.056	1.176	-0.454	1.473	2.102	-0.638	0.74	-1.196	0.423	-1.313	0.275	0.085	0.98	1.503	-1.042	1.408	-0.048	2.08995
1	2017-04-23	1.138	0.509	-0.279	0.151	0.454	2.079	-1.918	0.281	0.514	0.261	0.653	-0.656	-0.762	0.757	-0.51	0.458	-0.202	1.227	-0.07	0.178	-0.747	1.15613
1	2017-04-26	0.839	-0.049	0.628	-0.049	-0.221	0.892	0.58	-1.26	0.131	1.452	-0.042	0.584	-1.068	1.327	-0.644	0.292	-1.058	-0.066	2.513	-0.953	1.205	1.51677
1	2017-04-29	1.191	0.729	0.529	1.116	-0.546	-0.63	-1.373	1.943	-0.329	-0.553	1.527	0.585	-0.227	-1.788	0.817	0.897	0.349	-0.605	-1.454	2.121	0.448	1.93592
1	2017-05-05	0.766	0.689	0.3	0.564	0.37	0.842	-1.743	0.148	-0.186	0.387	0.515	-0.143	-0.885	0.601	-0.285	0.825	-1.04	0.19	0.118	0.148	-0.191	0.694072
1	2017-05-08	1.007	1.04	-0.686	-1.217	-0.748	0.867	-2.093	0.088	1.518	-0.174	1.462	-0.229	0.89	-0.439	-0.032	0.662	0.006	-0.216	0.117	0.467	-0.116	1.24097
1	2017-05-11	1.049	-0.622	1.231	1.23	-1.938	-0.39	-0.631	0.446	1.464	-0.916	0.576	0.08	2.003	-0.996	-0.482	0.076	-0.383	-0.257	-0.175	0.919	1.461	1.61497
1	2017-05-14	0.694	-0.309	0.611	-0.332	-1.802	0.567	-1.144	0.201	1.561	-0.581	0.401	0.054	-0.064	-0.274	-0.641	2.005	-0.484	0.655	0.09	0.258	1.178	1.20719
1	2017-05-17	-0.942	-0.463	0.686	1.521	-0.153	0.423	0.253	0.309	0.902	-0.396	-0.543	-1.511	0.091	0.256	0.063	1.399	-0.067	-0.387	0.158	1.728	-1.78	1.25472
1	2017-05-20	0.828	0.459	0.41	0.458	-0.59	-0.498	-1.264	0.902	0.529	-0.704	0.31	1.097	1.092	-2.041	-0.446	-0.092	1.439	1.853	-0.845	0.978	1.678	1.70089
1	2017-05-23	0.704	0.506	1.404	1.626	-0.451	-0.54	-0.99	-0.743	1.258	1.077	-1.026	1.479	1.679	0.258	1.963	2.15	0.029	1.256	2.147	-1.643	0.06	2.61034
1	2017-05-26	1.213	0.607	0.729	1.245	-0.663	-1.531	-1.514	2.17	0.084	0.571	0.344	-0.613	2.899	-0.911	0.276	0.753	-0.894	0.681	-0.26	-0.218	1.289	2.13072
1	2017-06-04	0.606	0.255	0.678	0.452	-0.908	0.172	-0.766	0.149	0.573	1.345	-0.038	0.309	-0.346	1.567	-0.676	0.425	-0.241	0.526	0.768	-1.575	-1.563	1.07541
1	2017-06-07	0.186	2.108	-0.503	1.504	-0.856	-0.911	-1.827	1.468	0.304	-0.243	1.289	-0.513	1.698	-1.824	0.413	0.56	1.944	0.694	-1.153	0.349	1.609	2.41561
1	2017-06-19	0.153	0.338	2.042	0.152	-1.14	-0.102	1.203	1.903	-0.925	1.007	0.208	-0.407	1.366	0.439	-0.246	-1.703	-2.35	1.329	0.243	0.276	1.823	2.21645
1	2017-06-25	-2.41	1.357	0.545	-0.897	-0.448	0.143	0.29	2.089	-1.408	2.385	0.644	0.591	-0.023	0.207	0.155	1.127	-1.061	0.523	-0.222	1.479	-1.76	2.32292
1	2017-06-28	1.393	0.581	2.132	-0.085	0.94	0.291	2.03	1.551	-1.334	1.778	0.009	-1.254	0.925	-0.715	-0.182	-2.223	-0.031	1.424	-1.023	1.144	0.868	2.50858
1	2017-07-07	-0.328	0.006	0.297	-0.188	1.763	-0.498	-1.111	1.735	-1.199	1.787	0.878	-0.033	-0.979	0.865	0.759	0.978	-0.847	1.739	-0.1	-0.142	-1.965	1.87123
1	2017-07-10	1.227	2.007	1.081	0.297	-2.235	0.724	-0.52	1.396	-0.756	0.066	1.463	0.366	1.39	-1.774	0.149	-0.274	1.287	0.17	-0.169	0.663	-0.674	1.95322
1	2017-07-16	1.437	-0.774	0.603	-1.644	-0.819	1.706	2.152	-0.397	-0.113	2.288	0.078	-0.022	-0.632	1.599	-0.589	0.172	1.867	0.266	2.77	-1.812	-0.875	2.94696
1	2017-07-19	1.012	-0.673	-0.333	0.136	0.16	0.361	-0.697	0.255	1.55	-0.025	0.097	0.791	-1.132	0.571	-0.057	0.647	0.134	1.498	0.31	-0.56	-1.01	0.859468
1	2017-07-22	0.39	0.394	0.314	0.836	-1.706	-0.283	0.164	-1.752	1.819	0.237	0.157	0.408	0.511	0.657	-0.049	0.795	1.098	-0.267	0.717	-1.071	-0.742	1.20807
1	2017-07-25	0.448	0.043	-1.504	1.153	1.212	-1.031	-0.113	0.405	1.61	-0.153	0.387	0.803	1.473	-1.732	1.43	0.365	1.243	1.195	-0.348	-0.163	0.237	1.58638
1	2017-07-28	-0.607	0.84	0.284	-0.017	-1.783	-0.238	-0.212	0.924	1.62	0.479	-0.104	0.689	0.675	0.327	-0.429	0.705	0.38	-1.066	0.463	-2.003	0.282	1.19996
1	2017-08-03	1.183	0.074	-0.675	-1.135	0.868	-1.09	-0.514	0.134	1.002	1.726	0.194	0.996	0.95	0.573	0.96	0.625	1.36	-0.244	0.569	-0.998	-1.178	1.36186
1	2017-08-06	0.75	-0.263	0.071	-0.96	-0.065	-0.35	-0.24	-0.163	0.717	-0.604	0.063	0.776	0.545	-0.845	0.215	0.423	0.543	1.073	-0.34	0.371	0.988	0.556239
1	2017-08-09	-0.371	-1.01	-0.09	-0.278	-0.261	-0.406	-0.571	-0.412	0.844	-0.143	-0.096	0.301	-0.143	0.354	0.545	0.405	-0.038	-0.738	0.53	0.45	-1.21	0.458347
1	2017-08-12	-1.27	-0.296	0.348	-1.009	-0.392	-1.171	0.116	0.081	0.968	-0.119	0.08	1.392	0.449	-0.777	1.114	1.566	1.643	-0.923	0.1	-0.123	1.201	1.30385
1	2017-08-15	0.635	0.028	0.645	0.38	0.479	-0.61	0.327	0.162	0.435	-0.768	0.081	1.83	-0.219	-1.1	0.826	-0.322	0.882	-0.965	-0.741	1.392	-0.247	0.9419
1	2017-08-18	-0.096	-0.616	0.256	-0.234	0.9	-1.464	2.109	0.136	2.162	-0.867	0.551	0.011	0.474	0.35	0.147	0.291	-1.485	-0.616	0.488	1.102	0.655	1.44206
1	2017-08-21	0.428	-0.075	0.906	0.38	-0.289	-0.268	1.191	0.025	2.201	-1.071	0.096	0.018	0.064	0.001	-0.048	-0.929	0.572	-1.325	0.256	0.938	-0.455	0.996209
1	2017-08-27	0.73	-0.026	0.65	2.435	1.161	-0.672	-0.374	-0.302	-0.016	1.328	-0.541	-0.48	-0.42	1.771	-0.212	-0.317	-0.112	0.683	-0.127	-0.105	-0.577	1.20315
1	2017-08-30	0.982	-0.205	-0.105	0.698	0.127	0.474	-0.982	-0.264	-0.471	2.443	0.109	0.491	0.479	2.108	-0.467	-0.392	-0.339	0.162	-0.344	-0.195	0.7	1.16858
1	2017-09-05	0.527	0.63	-0.202	1.129	1.471	-0.407	0.054	-1.03	1.247	-0.218	-1.499	0.138	0.376	-0.282	0.278	-0.558	0.225	-0.105	-0.323	1.015	1.023	0.939553
1	2017-09-08	-0.324	0.261	-2.116	2.004	1.313	1.673	1.733	-1.444	2.143	-1.161	-0.808	0.409	1.919	0.857	0.602	-0.838	-1.191	1.003	1.575	-0.309	1.67	2.97366
1	2017-09-11	1.282	0.403	-2.328	0.87	1.338	1.681	2.523	0.058	-0.398	-0.97	-0.889	0.581	-1.141	-1.054	0.387	0.688	1.716	0.854	-0.372	0.488	1.36	2.33878
1	2017-09-14	1.074	0.925	-0.828	-0.2	0.695	2.008	1.382	-2.41	1.268	-0.174	-1.431	0.503	-0.455	0.586	-0.297	-0.361	1.211	0.272	0.164	0.641	1.028	1.76284
1	2017-09-17	0.488	0.374	0.077	0.713	0.674	-0.035	1.157	-1.112	1.485	-0.095	-1.91	-0.496	0.655	1.267	-0.181	-0.478	-1.478	0.622	0.926	0.453	2.17	1.60443
1	2017-09-20	0.029	0.891	-1.675	1.705	1.347	-0.538	-0.319	-2.009	2.338	-1.276	-0.625	0.791	-0.65	-0.905	1.473	1.913	1.932	1.286	-0.877	1.932	1.657	3.14868
1	2017-09-23	0.898	0.316	-0.699	1.239	0.853	0.716	-0.767	-1.038	1.049	1.394	-1.083	0.572	-1.33	1.139	-0.408	1.615	-0.624	1.021	0.173	-0.741	1.601	1.61412
1	2017-09-26	0.857	0.864	-2.189	0.25	1.85	1.492	-0.928	-1.198	1.694	0.467	-0.587	0.183	-0.268	-0.11	0.057	0.97	0.446	0.848	-0.113	-0.171	0.909	1.59593
1	2017-09-29	0.924	0.025	-1.516	-0.108	1.97	0.709	0.703	-0.582	1.261	0.264	-1.162	0.319	1.757	0.909	-0.45	-1.726	-0.111	0.964	0.413	0.324	0.157	1.53919
1	2017-10-05	1.196	0.562	-2.54	-0.576	2.382	0.931	0.297	-0.534	1.577	0.175	-0.75	-0.784	1.928	-0.009	-0.392	0.126	-0.412	1.399	0.015	0.423	2.019	2.28268
1	2017-10-08	0.821	-0.122	-0.662	-0.429	1.546	0.365	0.525	-1.083	1.622	-0.752	-1.543	-0.419	0.273	-0.382	0.297	-0.406	1.694	1.302	-0.139	0.589	0.923	1.34227
1	2017-10-11	0.891	-0.476	0.227	0.074	1.191	1.922	0.743	-0.53	1.551	-0.585	-1.706	-0.905	1.207	1.431	-0.692	-1.904	-0.179	1.277	1.944	0.297	1.05	2.15335
1	2017-10-14	1.029	0.041	-1.444	0.542	0.401	-2.424	-1.673	0.964	1.741	0.986	0.692	1.441	3.965	-1.244	1.523	1.628	1.675	0.707	-0.821	0.237	-0.567	3.59845
1	2017-10-17	0.51	-0.052	-0.523	-0.394	1.423	0.769	-0.168	0.004	0.141	1.122	0.269	-0.835	0.805	0.409	-0.502	-1.211	-0.912	0.636	0.608	-0.185	1.567	0.93254
1	2017-10-20	-0.437	-0.498	1.851	1.37	1.332	-2.071	0.053	0.764	-0.422	-0.698	1.046	0.611	-0.578	-0.606	1.506	1.185	1.375	1.349	-0.438	0.87	0.516	1.84923
1	2017-10-23	1.16	-0.073	1.652	0.63	1.395	-1.333	0.192	1.54	-0.859	0.334	0.48	-0.674	0.515	-0.216	0.635	-1.4	0.881	0.916	-2.501	1.648	0.751	2.01566
1	2017-11-04	1.678	-0.082	0.08	-0.39	1.644	-1.78	-0.175	0.543	0.392	-0.068	0.515	0.502	-0.423	-0.165	-0.504	1.377	0.907	0.618	-0.753	-0.545	-0.273	1.11406
1	2017-11-10	1.506	0.016	-0.187	2.34	-0.267	-2.796	-1.211	1.311	0.832	-1.847	2.196	0.149	-0.381	-0.255	1.893	1.305	2.236	1.622	-1.571	1.517	0.943	3.61617
1	2017-11-13	0.388	-0.356	2.176	1.082	1.52	0.204	-0.779	0.036	0.13	0.565	-0.525	0.182	-0.329	2.062	0.114	-1.332	-0.527	-0.367	0.614	-0.182	-1.464	1.46714
1	2017-11-19	-0.377	-0.073	-0.296	0.677	0.264	0.362	0.197	0.582	-0.559	0.961	0.146	-0.576	0.58	0.453	-0.127	-1.134	1.199	0.076	-0.018	-0.292	-0.236	0.488173
1	2017-11-25	1.03	0.409	1.125	0.066	-2.024	2.502	-1.671	-0.298	0.444	0.266	0.465	1.032	-0.874	1.486	0.811	2.018	-0.039	0.214	0.774	-1	-1.402	2.21991
1	2017-11-28	-0.304	0.167	-0.12	-0.536	-1.875	-0.603	-1.491	0.776	-0.613	0.342	0.668	1.475	0.792	-0.52	0.76	1.18	0.844	0.499	-1.147	0.581	-0.085	1.22103
1	2017-12-04	-1.53	-0.813	0.084	-0.717	1.452	-0.754	1.141	-0.266	1.572	-0.943	-0.482	1.933	-0.771	0.35	1.494	1.114	-0.198	0.315	1.491	-0.057	-1.122	1.76321
1	2017-12-07	-1.236	-0.272	2.303	-1.069	0.15	-1.02	-0.458	-1.12	1.357	1.159	-0.065	-0.694	0.368	-0.021	0.235	0.957	1.473	0.304	0.551	-0.847	0.392	1.45849
1	2017-12-10	0.033	-0.517	0.981	-0.045	0.583	1.346	-0.19	-0.392	0.358	0.51	-0.539	-0.654	-1.043	1.889	-0.29	0.227	0.253	0.312	0.365	-1.026	-0.546	0.862984
1	2017-12-13	-0.154	-0.834	1.193	-0.107	0.025	-1.523	-0.061	0.299	0.366	1.172	0.226	0.05	1.349	1.187	-0.1	0.212	-1.548	-0.106	0.915	-0.54	-0.504	1.0248
1	2017-12-16	-0.903	-1.021	2.038	-0.566	-0.911	-1.91	1.329	0.208	2.181	-0.087	0.096	1.554	0.082	1.374	0.115	2.208	-1.881	-0.238	2.13	-1.021	-0.479	2.79394
1	2017-12-19	-0.275	-0.377	1.654	-0.159	0.366	-1.435	0.458	0.318	-0.944	1.497	-0.346	0.258	0.323	-0.649	-0.099	0.486	0.757	0.355	-0.617	-0.309	0.355	0.844063
1	2017-12-22	-0.875	-0.092	1.54	0.597	1.586	0.828	1.852	-0.58	-1.306	1.773	-0.992	-0.423	-1.179	2.163	-1.017	0.508	0.851	1.423	-0.182	-1.54	0.933	2.31832
1	2017-12-25	-0.738	0.385	0.624	-2.063	-0.831	0.587	0.178	0.541	-1.234	1.301	-0.275	-0.211	-0.696	0.65	0.933	2.055	1.918	1.052	0.059	0.101	-0.814	1.66851
1	2017-12-28	-0.532	-0.132	1.717	0.296	-0.275	2.215	0.171	0.409	-0.536	-0.734	0.04	0.322	-2.04	1.956	-0.323	0.8	1.87	-0.79	-0.031	-0.346	-1.905	2.02193
1	2018-01-03	0.228	0.842	0.868	0.499	-1.257	-0.691	-0.126	0.767	-1.28	2.174	0.065	0.349	0.619	-1.435	-0.088	0.778	1.628	-0.189	-0.274	-0.148	-0.958	1.37174
1	2018-01-06	0.004	-0.119	1.828	-0.638	-1.047	2.188	1.125	0.219	0.093	-1.593	0.254	0.203	-1.076	1.917	-0.141	0.521	-0.458	-1.037	0.348	-0.385	-0.485	1.59324
1	2018-01-09	0.973	-0.395	0.82	-0.863	0.568	0.514	0.014	0.089	-1.279	1.376	0.567	0.687	-1.166	1.656	0.076	0.217	-0.532	-0.279	0.061	-0.242	-0.749	0.976206
1	2018-01-12	-0.656	0.769	-0.859	0.957	-0.305	0.323	-0.442	1.638	-1.318	-0.648	0.496	0.217	0.403	-0.169	0.714	0.334	1.975	-2.067	-0.214	0.94	0.184	1.40884
1	2018-01-15	1.363	0.272	-0.573	-0.179	-0.209	-0.106	0.008	1.031	-0.759	1.191	1.017	-0.519	0.368	0.137	-0.012	0.446	-1.149	0.45	-0.556	0.591	-0.061	0.71772
1	2018-01-18	1.207	0.728	0.225	-0.633	-0.698	0.052	0.044	0.971	-0.208	-0.89	0.419	-0.04	1.666	-1.132	0.24	-0.133	0.728	-0.107	-1.21	0.244	0.149	0.861982
1	2018-01-21	-0.446	0.587	0.677	-0.07	-0.695	1.507	0.625	-0.533	-0.938	0.515	0.389	-0.714	1.945	-0.203	0.197	-0.544	1.65	-2.635	1.551	0.438	-0.095	1.75991
1	2018-01-24	0.462	-0.362	0.257	-0.455	0.499	1.778	1.391	-1.849	1.472	1.783	-0.807	-0.723	0.128	2.501	-0.788	-1.01	-0.358	1.374	0.9	-0.882	-0.455	2.14429
1	2018-01-27	-0.717	-0.536	-0.52	1.395	0.725	0.048	1.178	0.486	1.516	-2.348	-0.533	-0.132	0.622	-0.152	0.099	-1.073	1.936	1.584	-0.072	1.193	-0.052	1.74974
1	2018-01-30	0.376	0.049	-0.688	-0.009	1.443	1.851	0.924	-0.998	0.892	2.344	-0.42	-1.141	0.867	-0.228	-0.701	-1.425	2.202	1.415	-0.663	-1.123	0.68	2.17989
1	2018-02-05	0.422	-0.589	-0.689	-0.318	-1.571	1.577	2.233	1.295	-0.037	1.061	0.328	0.103	0.442	0.613	-1.194	0.328	-0.845	1.818	0.638	-0.36	2.488	2.08141
1	2018-02-08	0.365	0.946	-1.75	1.247	1.71	1.405	0.884	0.47	-1.526	0.244	-0.014	-1.304	-0.27	-0.218	-0.218	0.763	1.555	1.486	-0.154	0.572	-0.209	1.66156
1	2018-02-11	0.932	-1.181	0.307	0.546	1.602	1.86	1.729	0.228	-0.616	-0.554	-0.033	-0.387	-0.124	0.958	-0.253	-1.122	-0.461	0.264	0.726	0.16	0.695	1.25238
1	2018-02-14	0.731	-0.386	-0.493	-0.182	0.034	2.284	1.753	0.349	-0.281	-0.864	-0.002	0.3	0.382	1.68	-0.994	-1.293	-0.321	0.303	1.237	0.472	0.854	1.44322
1	2018-02-17	0.132	-1.063	0.158	-0.198	1.405	1.672	1.57	0.069	-0.763	-0.09	0.041	-0.101	-0.599	1.775	0.24	-0.525	-0.711	0.163	0.281	0	-0.808	1.09909
1	2018-02-20	-0.73	-1.485	0.219	-1.792	1.569	1.69	1.377	-0.337	-0.153	-0.64	0.543	-0.175	-0.504	1.155	0.004	0.072	-0.212	-0.086	0.262	0.864	-0.515	1.30477
1	2018-02-23	-1.226	-0.907	-0.051	-1.001	1.898	2.472	1.284	-1.056	-0.496	-0.272	-0.019	-0.123	-0.516	2.047	0.355	-1.2	-0.368	0.118	0.857	-0.153	0.61	1.81981
1	2018-02-26	0.376	-0.803	-0.281	-1.721	1.359	1.509	1.105	-0.495	-0.973	0.683	0.438	0.456	0.681	0.989	-0.632	-1.262	-0.525	0.933	0.317	0.291	0.57	1.2668
1	2018-03-04	0.687	-1.592	0.127	-2.003	1.324	1.872	1.198	-0.602	0.623	-1.142	0.552	0.539	-0.927	1.454	-0.143	-0.279	-0.488	-0.483	0.692	0.797	-0.275	1.63859
Q(true)/Qexp:		1.1293	0.71233	1.94553	1.65682	1.99683	2.32467	1.83174	1.50026	1.92115	1.80254	0.857217	0.84453	1.73712	1.87159	0.696913	1.71794	1.89706	1.44015	1.47572	1.25349	1.70774

## Sheet: Run Comparison
**** Run Comparison Statistics ****
Concentration of Species	Lowest Q (Robust) Run = Run 1
		Statistics Over All Runs
Factor 1	Lowest Q	Min	25th	50th	75th	Max	Mean	Std Dev	RSD % mean	RSD % Lowest Q
PM2.5	5.7995	5.7929	5.79542	5.79785	5.79965	5.8017	5.79761	0.00250029	0.000431263	0.000431122
Na	0.66525	0.66444	0.664802	0.66498	0.66528	0.66541	0.664991	0.000290304	0.000436553	0.000436384
Mg	0.043967	0.043919	0.043943	0.0439555	0.0439715	0.043984	0.0439549	1.75454e-05	0.000399167	0.000399057
P	0	0	0	0	0	0	0	0	0	0
K	0.094687	0.094572	0.0946198	0.094652	0.09469	0.094707	0.09465	3.96624e-05	0.000419042	0.000418879
Ca	0.19822	0.19801	0.198093	0.198175	0.198215	0.19845	0.198176	0.000108308	0.000546522	0.000546401
Sr	0.0021654	0.0021626	0.00216393	0.00216445	0.0021654	0.0021659	0.00216454	9.32724e-07	0.00043091	0.00043074
Zr	0.0041576	0.0041526	0.00415463	0.00415605	0.0041576	0.0041587	0.00415602	1.82197e-06	0.000438393	0.000438227
Ba	0.04214	0.042065	0.0420973	0.042107	0.0421337	0.042151	0.0421122	2.25675e-05	0.00053589	0.000535536
Pb	0	0	0	0	0	0	0	0	0	0
Al	0.25673	0.25642	0.25657	0.256635	0.256758	0.25677	0.256638	0.000107781	0.000419975	0.000419824
Ti	0.003299	0.0032974	0.00329877	0.00329965	0.00330097	0.0033026	0.0032998	1.30465e-06	0.000395372	0.000395468
V	8.9098e-05	8.907e-05	8.91278e-05	8.9176e-05	8.92162e-05	8.9267e-05	8.9173e-05	5.47141e-08	0.000613572	0.000614089
Cr	0.00024465	0.00024465	0.000246572	0.00024751	0.000248053	0.00024998	0.000247329	1.29209e-06	0.00522417	0.00528138
Mn	0.0003818	0.00038171	0.000381883	0.00038213	0.000382235	0.00038256	0.000382104	2.34844e-07	0.000614607	0.000615096
Fe	0.02247	0.022464	0.022472	0.022483	0.0224895	0.022505	0.0224822	1.16206e-05	0.000516881	0.000517163
Ni	0	0	0	0	0	0	0	0	0	0
Cu	0.00025244	0.0002522	0.00025234	0.000252395	0.000252498	0.00025258	0.000252401	1.042e-07	0.000412836	0.000412771
Zn	0.0023458	0.0023294	0.00233343	0.00233605	0.0023386	0.0023458	0.00233657	4.50839e-06	0.00192949	0.0019219
Mo	0.00023708	0.00023495	0.000236065	0.00023638	0.00023699	0.00023793	0.000236411	6.82626e-07	0.00288745	0.00287931
S	0.0011189	0.0010998	0.00110955	0.0011148	0.00111787	0.001127	0.00111421	6.39122e-06	0.00573607	0.00571205
		Statistics Over All Runs
Factor 2	Lowest Q	Min	25th	50th	75th	Max	Mean	Std Dev	RSD % mean	RSD % Lowest Q
PM2.5	7.2829	7.277	7.27832	7.2823	7.28573	7.293	7.28245	0.00429938	0.000590376	0.00059034
Na	0.10187	0.10166	0.101712	0.10175	0.101858	0.10195	0.101777	8.0138e-05	0.000787388	0.00078667
Mg	0.0073355	0.0073241	0.00732625	0.00733005	0.0073338	0.0073433	0.00733054	4.97864e-06	0.000679163	0.000678704
P	0.0057627	0.0057577	0.00575962	0.00576255	0.0057663	0.0057712	0.00576294	3.64784e-06	0.000632982	0.000633009
K	0.013319	0.013295	0.0132993	0.013305	0.0133148	0.013332	0.0133075	9.81661e-06	0.000737672	0.000737038
Ca	0	0	0	0	0	0	0	0	0	0
Sr	0.00025276	0.00025235	0.00025242	0.00025258	0.000252693	0.00025301	0.000252583	1.80324e-07	0.000713921	0.000713421
Zr	0.002918	0.0029156	0.00291582	0.0029175	0.00291878	0.0029215	0.00291749	1.71154e-06	0.000586648	0.000586546
Ba	0	0	0	0	0	0	0	0	0	0
Pb	0	0	0	0	0	0	0	0	0	0
Al	0.12004	0.11993	0.11994	0.120005	0.120055	0.12018	0.120009	7.10004e-05	0.000591625	0.000591473
Ti	0.0032419	0.0032391	0.0032396	0.0032413	0.0032427	0.0032459	0.00324137	1.88459e-06	0.000581418	0.000581323
V	0.00013999	0.00013986	0.000139883	0.00013995	0.000140017	0.00014016	0.000139959	8.08442e-08	0.000577628	0.0005775
Cr	0.0038112	0.0038079	0.00380847	0.00381085	0.00381255	0.0038155	0.00381067	2.21837e-06	0.000582147	0.000582066
Mn	0.0010326	0.0010318	0.001032	0.00103255	0.00103308	0.001034	0.00103258	6.01992e-07	0.000582995	0.000582987
Fe	0.037771	0.037741	0.0377463	0.0377655	0.0377832	0.03782	0.037767	2.19185e-05	0.000580361	0.0005803
Ni	0.0012297	0.0012287	0.001229	0.00122965	0.0012302	0.0012312	0.00122967	6.96684e-07	0.000566562	0.000566548
Cu	0.000417	0.00041647	0.000416533	0.00041677	0.000417053	0.00041736	0.000416781	2.69891e-07	0.00064756	0.00064722
Zn	0	0	0	0	0	0	0	0	0	0
Mo	0.0075406	0.0075348	0.00753705	0.00754085	0.00754512	0.007551	0.00754135	4.3997e-06	0.00058341	0.000583468
S	0.066587	0.066536	0.066553	0.066588	0.0666227	0.066677	0.0665914	3.87181e-05	0.000581429	0.000581467
		Statistics Over All Runs
Factor 3	Lowest Q	Min	25th	50th	75th	Max	Mean	Std Dev	RSD % mean	RSD % Lowest Q
PM2.5	9.3096	9.2981	9.30348	9.3075	9.30945	9.3143	9.30668	0.00435885	0.000468357	0.00046821
Na	0	0	0	0	0	0	0	0	0	0
Mg	0.0046574	0.0046483	0.00465093	0.00465175	0.00465477	0.0046593	0.0046528	2.95892e-06	0.000635946	0.000635317
P	0.0087976	0.0087866	0.0087916	0.0087953	0.0087974	0.0088014	0.00879453	4.16063e-06	0.000473092	0.000472927
K	0.0094812	0.0094671	0.00947097	0.00947325	0.00947903	0.0094836	0.0094742	4.94192e-06	0.000521619	0.000521234
Ca	0.06991	0.069738	0.0697648	0.0697945	0.0698398	0.069949	0.0698094	5.78321e-05	0.00082843	0.000827237
Sr	0.0002923	0.00029179	0.00029192	0.00029201	0.000292208	0.00029235	0.00029205	1.64971e-07	0.000564874	0.00056439
Zr	0.0028646	0.0028613	0.00286308	0.0028643	0.00286477	0.0028662	0.00286394	1.35972e-06	0.000474773	0.000474664
Ba	0	0	0	0	0	0	0	0	0	0
Pb	0.0080946	0.0080826	0.00808598	0.00809005	0.00809397	0.008097	0.00808983	4.26625e-06	0.00052736	0.000527049
Al	0.099676	0.099553	0.0996135	0.099658	0.099676	0.099724	0.0996463	4.76201e-05	0.000477891	0.000477749
Ti	0.0013406	0.0013382	0.00133932	0.00133985	0.00134052	0.0013411	0.00133982	7.81766e-07	0.000583486	0.000583146
V	0	0	0	0	0	0	0	0	0	0
Cr	0.00013323	0.00013277	0.000133327	0.000133735	0.000134325	0.00013463	0.000133808	5.91019e-07	0.00441694	0.00443608
Mn	0.00073132	0.00073028	0.0007308	0.000731105	0.00073131	0.00073166	0.000731042	3.72591e-07	0.000509671	0.000509477
Fe	0.019884	0.019853	0.0198677	0.019876	0.0198833	0.019893	0.0198749	1.0704e-05	0.000538569	0.000538324
Ni	0.00094036	0.0009393	0.00093996	0.000940305	0.000940613	0.00094107	0.000940264	4.80444e-07	0.000510966	0.000510915
Cu	0.00034076	0.00034037	0.000340617	0.000340745	0.000340888	0.00034107	0.000340747	1.81696e-07	0.000533229	0.000533208
Zn	0.012926	0.012914	0.012919	0.012924	0.0129268	0.012933	0.0129236	5.20526e-06	0.000402772	0.000402697
Mo	0.0092419	0.0092311	0.00923685	0.0092406	0.0092423	0.0092466	0.00923942	4.37993e-06	0.000474048	0.000473921
S	0.079397	0.079306	0.0793538	0.0793875	0.0794027	0.07944	0.0793774	3.77867e-05	0.000476038	0.00047592
		Statistics Over All Runs
Factor 4	Lowest Q	Min	25th	50th	75th	Max	Mean	Std Dev	RSD % mean	RSD % Lowest Q
PM2.5	6.0815	6.0695	6.0719	6.07395	6.0762	6.0815	6.0741	0.0030704	0.000505491	0.000504876
Na	0	0	0	0	0	0	0	0	0	0
Mg	0.015968	0.015946	0.01595	0.015955	0.0159625	0.015968	0.0159559	6.58127e-06	0.000412465	0.000412154
P	0.0043256	0.0043165	0.00431845	0.00432005	0.00432137	0.0043256	0.00431999	2.31219e-06	0.00053523	0.000534536
K	0.0047778	0.0047714	0.00477548	0.0047778	0.00478067	0.0047867	0.00477821	4.10305e-06	0.0008587	0.000858774
Ca	0.2533	0.25301	0.25306	0.25313	0.25328	0.25331	0.253158	0.000108123	0.000427096	0.000426856
Sr	0.0017848	0.0017821	0.00178262	0.00178325	0.001784	0.0017848	0.00178331	7.4302e-07	0.000416653	0.000416304
Zr	0.0029617	0.0029553	0.0029568	0.00295795	0.0029586	0.0029617	0.00295782	1.55695e-06	0.000526382	0.000525693
Ba	0.057337	0.057248	0.0572652	0.057286	0.057307	0.057337	0.057286	2.45667e-05	0.000428844	0.000428462
Pb	0.028764	0.028718	0.0287265	0.0287375	0.0287475	0.028764	0.0287372	1.25315e-05	0.000436073	0.000435667
Al	0.16212	0.16183	0.161883	0.16194	0.16199	0.16212	0.16194	7.58808e-05	0.000468574	0.000468053
Ti	0.0040848	0.0040778	0.0040792	0.0040805	0.0040821	0.0040848	0.00408059	1.83243e-06	0.000449059	0.000448597
V	0	0	0	0	0	0	0	0	0	0
Cr	0.000227	0.00022308	0.000224428	0.0002249	0.000225592	0.000227	0.000224972	9.49165e-07	0.00421903	0.00418134
Mn	0.0011111	0.0011091	0.00110953	0.00110985	0.0011103	0.0011111	0.00110988	5.21738e-07	0.000470085	0.000469569
Fe	0.01727	0.017237	0.0172425	0.017249	0.017254	0.01727	0.0172488	8.44097e-06	0.000489367	0.000488765
Ni	0.00019712	0.00019608	0.000196347	0.000196495	0.000196702	0.00019712	0.000196515	2.53927e-07	0.00129215	0.00128819
Cu	0	0	0	0	0	0	0	0	0	0
Zn	0	0	0	0	0	0	0	0	0	0
Mo	0.012087	0.012063	0.012068	0.012073	0.0120757	0.012087	0.0120722	6.13767e-06	0.000508412	0.000507791
S	0.077006	0.076838	0.0768758	0.0769085	0.076925	0.077006	0.0769056	4.13082e-05	0.000537129	0.000536428
		Statistics Over All Runs
Factor 5	Lowest Q	Min	25th	50th	75th	Max	Mean	Std Dev	RSD % mean	RSD % Lowest Q
PM2.5	9.974	9.9693	9.97193	9.9759	9.97955	9.9869	9.97638	0.00483219	0.000484364	0.000484479
Na	0	0	0	0	0	0	0	0	0	0
Mg	0.032069	0.032053	0.0320628	0.0320775	0.0320892	0.032109	0.0320776	1.52433e-05	0.0004752	0.000475328
P	0.0082171	0.0082128	0.00821547	0.00821855	0.0082217	0.0082284	0.00821915	4.10257e-06	0.000499147	0.000499272
K	0.046773	0.046752	0.0467655	0.0467865	0.0468027	0.046833	0.046787	2.2343e-05	0.000477547	0.000477689
Ca	0.57767	0.57739	0.57757	0.57783	0.578045	0.5784	0.577833	0.000280325	0.00048513	0.000485268
Sr	0.0010173	0.0010167	0.00101705	0.00101755	0.0010179	0.0010185	0.00101753	4.8569e-07	0.000477322	0.00047743
Zr	0.00058641	0.00058602	0.000586275	0.00058641	0.000586605	0.00058714	0.000586459	2.82822e-07	0.000482254	0.000482294
Ba	0	0	0	0	0	0	0	0	0	0
Pb	0.0020408	0.002037	0.00203902	0.00204055	0.00204103	0.0020425	0.00204015	1.30202e-06	0.0006382	0.000637996
Al	0.097498	0.097449	0.097473	0.097511	0.0975493	0.097618	0.0975157	4.51184e-05	0.000462678	0.000462762
Ti	0.0062146	0.0062118	0.00621327	0.0062158	0.0062181	0.0062225	0.00621607	2.93421e-06	0.000472036	0.000472148
V	0.00030028	0.00030014	0.000300213	0.000300325	0.000300437	0.00030066	0.000300336	1.39752e-07	0.000465318	0.000465404
Cr	0.00059013	0.00058851	0.000589285	0.000589755	0.000590322	0.00059071	0.000589782	5.90741e-07	0.00100163	0.00100104
Mn	0.001599	0.0015983	0.00159865	0.00159935	0.0015999	0.001601	0.00159939	7.46853e-07	0.000466961	0.000467075
Fe	0.073576	0.073547	0.073562	0.0735915	0.0736197	0.07367	0.0735951	3.43623e-05	0.000466909	0.000467031
Ni	0.00017775	0.00017759	0.000177707	0.000177785	0.000177865	0.00017806	0.000177791	1.08623e-07	0.000610959	0.0006111
Cu	0.00032744	0.00032723	0.000327323	0.00032742	0.000327537	0.00032781	0.000327445	1.50035e-07	0.000458199	0.000458206
Zn	0	0	0	0	0	0	0	0	0	0
Mo	0	0	0	0	0	0	0	0	0	0
S	0.0033523	0.0033416	0.00334705	0.00335005	0.0033535	0.0033565	0.00334993	4.04801e-06	0.00120839	0.00120753
Percent of Species Sum		Statistics Over All Runs
Factor 1	Lowest Q	Min	25th	50th	75th	Max	Mean	Std Dev	RSD % mean	RSD % Lowest Q
PM2.5	15.0842	15.0697	15.077	15.0846	15.0875	15.0961	15.0833	0.00660879	0.000438152	0.000438126
Na	86.7205	86.7107	86.7199	86.7266	86.7331	86.7388	86.7265	0.00874104	0.000100789	0.000100796
Mg	42.2772	42.2506	42.2638	42.2775	42.2843	42.2962	42.2758	0.0131495	0.000311041	0.000311031
P	0	0	0	0	0	0	0	0	0	0
K	56.0152	55.9773	55.9942	56.0102	56.0168	56.0272	56.0069	0.0141102	0.000251937	0.0002519
Ca	18.0348	18.016	18.0255	18.0347	18.0377	18.0574	18.0328	0.00987771	0.000547765	0.000547704
Sr	39.2812	39.26	39.2724	39.2851	39.293	39.3024	39.2838	0.0128243	0.000326453	0.000326475
Zr	30.8237	30.8025	30.8194	30.8268	30.8367	30.8439	30.827	0.0114415	0.00037115	0.00037119
Ba	42.3616	42.3311	42.3586	42.3683	42.3764	42.3966	42.3672	0.0158976	0.000375234	0.000375284
Pb	0	0	0	0	0	0	0	0	0	0
Al	34.8788	34.8568	34.872	34.8812	34.8905	34.8996	34.8812	0.0119543	0.000342715	0.000342739
Ti	18.1454	18.1392	18.1459	18.1537	18.1582	18.1679	18.1531	0.00804559	0.000443208	0.000443395
V	16.831	16.8289	16.8334	16.8427	16.8479	16.8595	16.842	0.00923013	0.000548043	0.0005484
Cr	4.88693	4.88693	4.92307	4.94071	4.954	4.9932	4.9401	0.025787	0.00521994	0.00527673
Mn	7.86273	7.86273	7.86565	7.87059	7.87348	7.88062	7.87032	0.00490965	0.000623819	0.000624421
Fe	13.1426	13.1404	13.1447	13.1499	13.1543	13.1637	13.15	0.00659449	0.000501484	0.000501766
Ni	0	0	0	0	0	0	0	0	0	0
Cu	18.872	18.8587	18.8689	18.874	18.8785	18.8852	18.8729	0.00734918	0.000389405	0.000389421
Zn	15.3603	15.2734	15.2948	15.3128	15.3234	15.3603	15.3115	0.0225626	0.00147357	0.00146889
Mo	0.814524	0.807926	0.811198	0.812732	0.814475	0.817743	0.812704	0.0022681	0.0027908	0.00278457
S	0.491908	0.483932	0.48819	0.490489	0.491638	0.495633	0.490112	0.00272967	0.00556947	0.00554914
		Statistics Over All Runs
Factor 2	Lowest Q	Min	25th	50th	75th	Max	Mean	Std Dev	RSD % mean	RSD % Lowest Q
PM2.5	18.9425	18.9313	18.9425	18.9443	18.9527	18.9654	18.9464	0.00856561	0.000452098	0.000452191
Na	13.2795	13.2612	13.2669	13.2734	13.2801	13.2893	13.2735	0.00874104	0.000658533	0.000658233
Mg	7.05358	7.04578	7.04675	7.05007	7.05329	7.06028	7.05051	0.00405373	0.000574956	0.000574706
P	21.2622	21.2494	21.2623	21.2673	21.2747	21.289	21.2681	0.00977701	0.000459703	0.00045983
K	7.87929	7.86856	7.87	7.87388	7.87855	7.88566	7.87443	0.00475229	0.000603509	0.000603136
Ca	0	0	0	0	0	0	0	0	0	0
Sr	4.58517	4.5809	4.58129	4.58441	4.58584	4.59044	4.58407	0.002851	0.000621936	0.000621787
Zr	21.6335	21.6204	21.6337	21.6388	21.6509	21.6593	21.6403	0.0107344	0.000496039	0.000496194
Ba	0	0	0	0	0	0	0	0	0	0
Pb	0	0	0	0	0	0	0	0	0	0
Al	16.3084	16.2978	16.3063	16.3092	16.3186	16.3273	16.3111	0.00812244	0.000497969	0.000498054
Ti	17.8314	17.82	17.8261	17.8311	17.837	17.849	17.8316	0.00764903	0.000428958	0.000428965
V	26.4447	26.4153	26.4261	26.4325	26.4423	26.457	26.4339	0.0108903	0.000411982	0.000411813
Cr	76.1294	76.0924	76.1066	76.1135	76.1211	76.1294	76.1135	0.00987838	0.000129785	0.000129758
Mn	21.2652	21.2555	21.2633	21.2663	21.2744	21.2883	21.2685	0.00864322	0.000406387	0.000406449
Fe	22.0921	22.0767	22.0842	22.0876	22.094	22.1102	22.0901	0.00882825	0.000399648	0.000399612
Ni	48.3196	48.3007	48.3214	48.3324	48.3444	48.355	48.3315	0.0150376	0.000311134	0.000311211
Cu	31.1743	31.1394	31.1528	31.1635	31.1747	31.1877	31.1642	0.0136364	0.000437566	0.000437424
Zn	0	0	0	0	0	0	0	0	0	0
Mo	25.9069	25.9019	25.9148	25.9262	25.9338	25.9462	25.9247	0.0130909	0.00050496	0.000505308
S	29.274	29.2674	29.2819	29.2929	29.3032	29.3145	29.2917	0.0136283	0.00046526	0.000465542
		Statistics Over All Runs
Factor 3	Lowest Q	Min	25th	50th	75th	Max	Mean	Std Dev	RSD % mean	RSD % Lowest Q
PM2.5	24.2138	24.1937	24.2081	24.2134	24.2186	24.2287	24.2127	0.00887507	0.000366546	0.000366529
Na	0	0	0	0	0	0	0	0	0	0
Mg	4.4784	4.46993	4.47307	4.47459	4.47737	4.48118	4.47505	0.00270684	0.000604873	0.000604421
P	32.4599	32.4369	32.4494	32.4552	32.4624	32.4793	32.4562	0.0120468	0.00037117	0.000371128
K	5.60892	5.60048	5.60408	5.60614	5.60851	5.61077	5.60614	0.00273409	0.000487697	0.000487455
Ca	6.36066	6.34512	6.34889	6.35145	6.35599	6.36659	6.35221	0.00553093	0.000870709	0.000869553
Sr	5.30244	5.29482	5.29829	5.30058	5.30219	5.30496	5.30034	0.00260128	0.000490775	0.000490582
Zr	21.2376	21.2242	21.2377	21.2427	21.2489	21.2566	21.2431	0.0078424	0.000369174	0.000369269
Ba	0	0	0	0	0	0	0	0	0	0
Pb	20.8091	20.7988	20.8065	20.8156	20.8207	20.8298	20.814	0.00941474	0.000452327	0.000452435
Al	13.5418	13.5301	13.5405	13.5423	13.5479	13.5524	13.5435	0.00536057	0.000395804	0.000395855
Ti	7.37367	7.36156	7.36876	7.37018	7.37363	7.37763	7.3707	0.00409756	0.000555925	0.000555701
V	0	0	0	0	0	0	0	0	0	0
Cr	2.66129	2.65345	2.664	2.67137	2.68358	2.68943	2.67264	0.0113273	0.00423824	0.00425631
Mn	15.0607	15.0435	15.0544	15.0569	15.0618	15.07	15.0575	0.00696408	0.000462499	0.000462401
Fe	11.63	11.6125	11.622	11.6245	11.6301	11.6361	11.6249	0.00627678	0.00053994	0.000539704
Ni	36.9503	36.93	36.946	36.9531	36.9695	36.9878	36.9566	0.0154157	0.00041713	0.0004172
Cu	25.4747	25.4536	25.4733	25.4777	25.4853	25.5011	25.4788	0.0114561	0.000449633	0.000449705
Zn	84.6397	84.6397	84.6766	84.6872	84.7052	84.7266	84.6885	0.0225626	0.000266419	0.000266572
Mo	31.7519	31.7406	31.7528	31.7617	31.7723	31.7797	31.7621	0.0111636	0.000351475	0.000351587
S	34.9057	34.8918	34.9064	34.9181	34.9251	34.9362	34.916	0.0119816	0.000343155	0.000343255
		Statistics Over All Runs
Factor 4	Lowest Q	Min	25th	50th	75th	Max	Mean	Std Dev	RSD % mean	RSD % Lowest Q
PM2.5	15.8177	15.7889	15.7962	15.8032	15.8076	15.8177	15.8027	0.00756879	0.000478957	0.000478502
Na	0	0	0	0	0	0	0	0	0	0
Mg	15.3543	15.3345	15.3412	15.3459	15.3525	15.3583	15.3464	0.00685621	0.000446763	0.000446533
P	15.9599	15.9281	15.938	15.9427	15.9486	15.9599	15.9429	0.00792709	0.000497217	0.000496689
K	2.82647	2.8229	2.82536	2.82767	2.82914	2.83261	2.8274	0.00273227	0.000966357	0.000966675
Ca	23.0461	23.0103	23.0275	23.0369	23.0444	23.0542	23.0358	0.0105167	0.000456536	0.000456331
Sr	32.377	32.3431	32.3566	32.363	32.3741	32.3866	32.3648	0.0112807	0.000348547	0.000348416
Zr	21.9575	21.9178	21.9321	21.94	21.9441	21.9575	21.9395	0.00940635	0.000428741	0.000428388
Ba	57.6384	57.6034	57.6236	57.6317	57.6414	57.6689	57.6328	0.0158976	0.000275843	0.000275816
Pb	73.9446	73.9147	73.9315	73.9374	73.9443	73.953	73.937	0.0100745	0.000136258	0.000136244
Al	22.0253	21.9914	22.0033	22.01	22.0156	22.0259	22.0102	0.00885326	0.000402234	0.000401959
Ti	22.4675	22.4324	22.4392	22.4487	22.4556	22.4675	22.4484	0.0099217	0.000441978	0.000441601
V	0	0	0	0	0	0	0	0	0	0
Cr	4.53437	4.45589	4.48218	4.49187	4.50488	4.53437	4.49355	0.0189069	0.00420756	0.00416968
Mn	22.8818	22.8427	22.8513	22.8619	22.8688	22.8818	22.8606	0.0106169	0.000464418	0.000463987
Fe	10.1011	10.0793	10.0839	10.0887	10.0935	10.1011	10.0889	0.00562714	0.000557757	0.00055708
Ni	7.7456	7.70943	7.71968	7.72265	7.72987	7.7456	7.72392	0.00895806	0.00115978	0.00115654
Cu	0	0	0	0	0	0	0	0	0	0
Zn	0	0	0	0	0	0	0	0	0	0
Mo	41.5267	41.4688	41.4893	41.5002	41.5131	41.5267	41.5005	0.014631	0.000352549	0.000352327
S	33.8546	33.8005	33.8168	33.8284	33.8397	33.8546	33.8287	0.0138867	0.000410501	0.000410187
		Statistics Over All Runs
Factor 5	Lowest Q	Min	25th	50th	75th	Max	Mean	Std Dev	RSD % mean	RSD % Lowest Q
PM2.5	25.9419	25.9419	25.9463	25.9533	25.9626	25.9732	25.955	0.00974811	0.000375578	0.000375768
Na	0	0	0	0	0	0	0	0	0	0
Mg	30.8365	30.8334	30.8424	30.8492	30.8599	30.8796	30.8522	0.0130281	0.000422273	0.000422489
P	30.318	30.318	30.3249	30.3298	30.3435	30.3532	30.3328	0.0103956	0.000342718	0.000342885
K	27.6701	27.6645	27.6747	27.6818	27.6961	27.7122	27.6851	0.0135131	0.0004881	0.000488364
Ca	52.5585	52.5585	52.5691	52.577	52.5871	52.6132	52.5792	0.014654	0.000278702	0.000278812
Sr	18.4542	18.4542	18.4602	18.4654	18.4723	18.4866	18.4669	0.00928798	0.000502952	0.000503298
Zr	4.34754	4.34698	4.34756	4.35031	4.35181	4.35444	4.35003	0.00239814	0.000551292	0.000551607
Ba	0	0	0	0	0	0	0	0	0	0
Pb	5.24635	5.24334	5.24709	5.2486	5.25101	5.25555	5.24902	0.00319923	0.000609491	0.000609801
Al	13.2459	13.2457	13.2496	13.2518	13.258	13.2657	13.2539	0.00634669	0.000478853	0.000479145
Ti	34.182	34.1819	34.1875	34.1925	34.2038	34.2177	34.1962	0.0110788	0.000323976	0.000324111
V	56.7242	56.6967	56.7172	56.7241	56.7351	56.7433	56.7241	0.0116435	0.000205266	0.000205265
Cr	11.788	11.7554	11.7708	11.78	11.7907	11.8017	11.7802	0.012792	0.00108589	0.00108518
Mn	32.9296	32.9296	32.9357	32.9407	32.9518	32.961	32.9431	0.0101968	0.000309526	0.000309653
Fe	43.0342	43.0284	43.0389	43.044	43.0558	43.0649	43.0461	0.010598	0.0002462	0.000246268
Ni	6.98448	6.97793	6.98485	6.98845	6.99194	6.99507	6.98798	0.00450441	0.000644594	0.000644918
Cu	24.4789	24.4652	24.4766	24.4853	24.4913	24.5016	24.4842	0.00920569	0.000375985	0.000376066
Zn	0	0	0	0	0	0	0	0	0	0
Mo	0	0	0	0	0	0	0	0	0	0
S	1.47379	1.46976	1.47241	1.47382	1.47499	1.47645	1.47354	0.00189262	0.0012844	0.00128418
Percent of Total Variable		Statistics Over All Runs
Factor 1	Lowest Q	Min	25th	50th	75th	Max	Mean	Std Dev	RSD % mean	RSD % Lowest Q
PM2.5	81.2567	81.2538	81.2556	81.2571	81.2585	81.263	81.2571	0.00218575	2.68992e-05	2.68994e-05
Na	9.32081	9.31648	9.31896	9.32036	9.3215	9.32367	9.32027	0.00185167	0.000198672	0.00019866
Mg	0.616021	0.615868	0.616023	0.616061	0.616102	0.616162	0.616056	6.43326e-05	0.000104426	0.000104432
P	0	0	0	0	0	0	0	0	0	0
K	1.32666	1.32619	1.32646	1.3266	1.32666	1.32682	1.32658	0.000160271	0.000120815	0.000120808
Ca	2.77726	2.77559	2.77699	2.77748	2.77818	2.77949	2.77756	0.000857208	0.000308619	0.000308653
Sr	0.0303394	0.0303255	0.0303351	0.0303374	0.0303399	0.0303447	0.0303375	4.28379e-06	0.000141205	0.000141196
Zr	0.0582521	0.0582271	0.0582412	0.058249	0.0582584	0.0582766	0.0582492	1.18904e-05	0.00020413	0.00020412
Ba	0.590423	0.589907	0.590095	0.590248	0.590316	0.590561	0.590228	0.000158468	0.000268486	0.000268398
Pb	0	0	0	0	0	0	0	0	0	0
Al	3.59704	3.59562	3.59663	3.59692	3.59744	3.59802	3.59694	0.000568207	0.000157969	0.000157965
Ti	0.0462222	0.0462222	0.0462448	0.0462504	0.0462572	0.0462697	0.0462488	1.28949e-05	0.000278816	0.000278976
V	0.00124835	0.00124792	0.00124948	0.00124984	0.00125032	0.00125103	0.00124981	7.84895e-07	0.000628009	0.000628745
Cr	0.00342779	0.00342779	0.00345646	0.00346827	0.00347672	0.003505	0.00346647	1.87429e-05	0.00540689	0.00546791
Mn	0.00534939	0.00534798	0.00535436	0.00535513	0.00535798	0.00536028	0.00535543	3.18212e-06	0.000594186	0.000594856
Fe	0.314827	0.314734	0.315035	0.315109	0.315214	0.315332	0.315103	0.000151765	0.000481636	0.000482058
Ni	0	0	0	0	0	0	0	0	0	0
Cu	0.00353693	0.00353595	0.0035371	0.00353753	0.003538	0.00353889	0.00353755	7.70284e-07	0.000217745	0.000217783
Zn	0.032867	0.0326489	0.0327098	0.0327436	0.0327712	0.032867	0.0327484	5.63681e-05	0.00172125	0.00171504
Mo	0.00332172	0.00329071	0.00330779	0.00331273	0.00332059	0.00333416	0.00331345	9.35617e-06	0.0028237	0.00281666
S	0.0156769	0.0154038	0.0155515	0.015624	0.0156731	0.0157929	0.0156164	8.8466e-05	0.00566494	0.00564308
		Statistics Over All Runs
Factor 2	Lowest Q	Min	25th	50th	75th	Max	Mean	Std Dev	RSD % mean	RSD % Lowest Q
PM2.5	95.1246	95.1244	95.1255	95.126	95.1267	95.1275	95.1261	0.00090993	9.56552e-06	9.56567e-06
Na	1.33056	1.32838	1.32887	1.32952	1.32987	1.33059	1.32945	0.00068817	0.000517636	0.000517203
Mg	0.0958116	0.0957047	0.0957194	0.0957563	0.0957784	0.095825	0.0957542	3.35237e-05	0.000350101	0.000349892
P	0.0752687	0.0752642	0.07527	0.0752766	0.0752839	0.0752915	0.0752776	8.08365e-06	0.000107385	0.000107397
K	0.173964	0.173718	0.173744	0.173837	0.17388	0.173987	0.173828	7.77588e-05	0.000447332	0.000446981
Ca	0	0	0	0	0	0	0	0	0	0
Sr	0.00330139	0.00329696	0.00329811	0.00329941	0.00330029	0.00330236	0.00329933	1.36922e-06	0.000415001	0.000414742
Zr	0.0381131	0.0381034	0.0381066	0.0381092	0.0381117	0.0381151	0.0381093	3.41607e-06	8.96386e-05	8.96298e-05
Ba	0	0	0	0	0	0	0	0	0	0
Pb	0	0	0	0	0	0	0	0	0	0
Al	1.56789	1.56731	1.56748	1.56758	1.5677	1.56798	1.5676	0.000176276	0.00011245	0.000112429
Ti	0.0423436	0.0423376	0.0423384	0.0423396	0.042341	0.0423452	0.04234	2.16587e-06	5.11542e-05	5.11498e-05
V	0.00182846	0.00182789	0.00182807	0.0018282	0.00182822	0.00182859	0.0018282	1.67028e-07	9.1362e-05	9.13488e-05
Cr	0.0497795	0.0497673	0.0497745	0.0497768	0.0497791	0.0497821	0.0497764	3.86819e-06	7.77113e-05	7.77065e-05
Mn	0.0134872	0.0134868	0.0134876	0.013488	0.0134885	0.013489	0.013488	6.33125e-07	4.69399e-05	4.69428e-05
Fe	0.493341	0.493301	0.493308	0.493324	0.49334	0.493387	0.493326	2.15582e-05	4.36996e-05	4.36984e-05
Ni	0.0160616	0.0160591	0.0160619	0.0160625	0.0160628	0.0160648	0.0160624	1.16119e-06	7.22925e-05	7.22963e-05
Cu	0.00544659	0.00544174	0.00544332	0.00544385	0.00544496	0.00544659	0.00544414	1.2269e-06	0.000225361	0.00022526
Zn	0	0	0	0	0	0	0	0	0	0
Mo	0.0984905	0.0984905	0.0985024	0.098508	0.0985141	0.0985249	0.0985078	9.14908e-06	9.28767e-05	9.2893e-05
S	0.869717	0.869698	0.869787	0.869846	0.869891	0.869952	0.869841	7.01812e-05	8.06827e-05	8.06942e-05
		Statistics Over All Runs
Factor 3	Lowest Q	Min	25th	50th	75th	Max	Mean	Std Dev	RSD % mean	RSD % Lowest Q
PM2.5	96.5896	96.5894	96.5902	96.5904	96.5907	96.5911	96.5904	0.000434778	4.50125e-06	4.50129e-06
Na	0	0	0	0	0	0	0	0	0	0
Mg	0.0483218	0.0482618	0.0482789	0.0482835	0.0483011	0.0483346	0.0482895	1.92057e-05	0.00039772	0.000397455
P	0.0912774	0.0912712	0.0912736	0.0912746	0.0912773	0.0912794	0.091275	2.24022e-06	2.45437e-05	2.4543e-05
K	0.09837	0.098294	0.0983025	0.0983255	0.0983453	0.0983874	0.0983291	2.75105e-05	0.00027978	0.000279663
Ca	0.725335	0.723756	0.724171	0.72446	0.724729	0.725636	0.724524	0.000460588	0.000635711	0.000635
Sr	0.00303269	0.00302995	0.00303056	0.00303083	0.00303151	0.00303278	0.00303107	7.58341e-07	0.00025019	0.000250056
Zr	0.029721	0.0297188	0.0297219	0.0297238	0.0297257	0.0297266	0.0297237	2.17264e-06	7.30945e-05	7.31012e-05
Ba	0	0	0	0	0	0	0	0	0	0
Pb	0.0839836	0.0839417	0.0839477	0.0839606	0.0839693	0.0839966	0.0839611	1.50669e-05	0.000179451	0.000179403
Al	1.03416	1.03412	1.03416	1.03418	1.03423	1.03427	1.03419	3.87567e-05	3.74755e-05	3.74764e-05
Ti	0.0139091	0.0139015	0.0139042	0.0139055	0.013907	0.0139091	0.0139055	2.01996e-06	0.000145264	0.000145226
V	0	0	0	0	0	0	0	0	0	0
Cr	0.0013823	0.00137826	0.00138433	0.0013881	0.00139351	0.00139768	0.00138873	5.90084e-06	0.00424908	0.00426887
Mn	0.00758764	0.00758629	0.00758692	0.00758724	0.00758756	0.0075878	0.00758719	3.9836e-07	5.25042e-05	5.25011e-05
Fe	0.206302	0.206237	0.20626	0.206273	0.206288	0.206303	0.206274	1.91287e-05	9.27345e-05	9.27222e-05
Ni	0.00975648	0.00975552	0.00975766	0.0097586	0.00975995	0.0097607	0.00975864	1.44811e-06	0.000148393	0.000148426
Cu	0.00353547	0.00353497	0.00353606	0.00353653	0.00353704	0.00353748	0.00353647	6.71859e-07	0.00018998	0.000190033
Zn	0.134111	0.134111	0.13412	0.134128	0.134139	0.134153	0.134129	1.15373e-05	8.60165e-05	8.60283e-05
Mo	0.0958872	0.0958819	0.0958869	0.0958935	0.0958989	0.0959	0.0958923	6.19902e-06	6.46456e-05	6.46491e-05
S	0.823765	0.823721	0.823786	0.823842	0.823877	0.823904	0.823827	5.56636e-05	6.75671e-05	6.75722e-05
		Statistics Over All Runs
Factor 4	Lowest Q	Min	25th	50th	75th	Max	Mean	Std Dev	RSD % mean	RSD % Lowest Q
PM2.5	90.4336	90.428	90.4299	90.4305	90.4317	90.4336	90.4307	0.00139087	1.53806e-05	1.53801e-05
Na	0	0	0	0	0	0	0	0	0	0
Mg	0.237449	0.237449	0.237506	0.237566	0.237582	0.237662	0.237551	5.39984e-05	0.000227313	0.000227411
P	0.0643229	0.0643058	0.0643114	0.0643147	0.0643197	0.0643308	0.0643157	6.1855e-06	9.61741e-05	9.61633e-05
K	0.0710472	0.0710316	0.0710821	0.07114	0.071187	0.0712748	0.0711377	6.5372e-05	0.000918951	0.000920121
Ca	3.76664	3.76664	3.76812	3.76916	3.76974	3.77153	3.769	0.00123001	0.000326349	0.000326553
Sr	0.0265405	0.0265405	0.0265474	0.0265501	0.0265517	0.0265567	0.0265497	3.98353e-06	0.00015004	0.000150093
Zr	0.0440413	0.0440272	0.0440324	0.0440362	0.0440391	0.044044	0.0440359	4.4303e-06	0.000100607	0.000100594
Ba	0.852617	0.852617	0.852803	0.852893	0.852939	0.853019	0.852869	0.000101326	0.000118806	0.000118841
Pb	0.427729	0.427729	0.427808	0.427849	0.42787	0.427917	0.427838	4.97151e-05	0.000116201	0.00011623
Al	2.41077	2.41069	2.41088	2.41095	2.41103	2.41117	2.41095	0.000132995	5.51631e-05	5.51672e-05
Ti	0.0607421	0.0607421	0.0607484	0.0607516	0.0607552	0.0607579	0.0607515	4.13843e-06	6.81206e-05	6.81311e-05
V	0	0	0	0	0	0	0	0	0	0
Cr	0.00337555	0.0033217	0.00334047	0.00334993	0.00335771	0.00337555	0.00334937	1.33156e-05	0.00397557	0.00394473
Mn	0.0165224	0.0165224	0.0165233	0.0165239	0.0165243	0.016525	0.0165238	7.06885e-07	4.27798e-05	4.27835e-05
Fe	0.25681	0.256768	0.256786	0.256798	0.256809	0.25683	0.256798	1.53237e-05	5.96721e-05	5.96694e-05
Ni	0.00293123	0.00292011	0.00292396	0.00292529	0.00292734	0.00293125	0.0029257	2.83328e-06	0.00096841	0.000966583
Cu	0	0	0	0	0	0	0	0	0	0
Zn	0	0	0	0	0	0	0	0	0	0
Mo	0.179737	0.179697	0.179722	0.179732	0.179741	0.179758	0.179731	1.44221e-05	8.0243e-05	8.02402e-05
S	1.1451	1.14468	1.14486	1.14498	1.14506	1.14519	1.14496	0.000139224	0.000121597	0.000121582
		Statistics Over All Runs
Factor 5	Lowest Q	Min	25th	50th	75th	Max	Mean	Std Dev	RSD % mean	RSD % Lowest Q
PM2.5	92.13	92.1292	92.1295	92.1299	92.13	92.1303	92.1298	0.000308098	3.34418e-06	3.34417e-06
Na	0	0	0	0	0	0	0	0	0	0
Mg	0.296222	0.296207	0.296217	0.296228	0.296243	0.296265	0.29623	1.65782e-05	5.59639e-05	5.59654e-05
P	0.0759015	0.0758959	0.0758997	0.0759019	0.0759042	0.0759081	0.0759021	3.1943e-06	4.20845e-05	4.20849e-05
K	0.432043	0.432039	0.432052	0.432065	0.432083	0.432103	0.432068	1.99296e-05	4.61261e-05	4.61287e-05
Ca	5.33595	5.33579	5.33592	5.33613	5.33634	5.33671	5.33617	0.000293513	5.50045e-05	5.50068e-05
Sr	0.00939681	0.0093955	0.00939617	0.00939682	0.00939715	0.00939779	0.00939668	6.36751e-07	6.77634e-05	6.77624e-05
Zr	0.00541668	0.0054138	0.00541456	0.00541608	0.00541667	0.00541794	0.00541583	1.20058e-06	0.000221679	0.000221645
Ba	0	0	0	0	0	0	0	0	0	0
Pb	0.0188509	0.0188247	0.0188375	0.0188397	0.0188448	0.0188509	0.0188404	6.52622e-06	0.000346395	0.000346202
Al	0.90059	0.900443	0.900509	0.900539	0.900564	0.900616	0.900538	4.10701e-05	4.56061e-05	4.56035e-05
Ti	0.0574043	0.0574011	0.0574033	0.0574043	0.0574051	0.0574074	0.0574041	1.6681e-06	2.90589e-05	2.90588e-05
V	0.00277369	0.00277326	0.00277342	0.00277353	0.00277368	0.00277386	0.00277354	1.56571e-07	5.64517e-05	5.64487e-05
Cr	0.00545104	0.00543681	0.00544123	0.00544643	0.00545038	0.00545721	0.00544652	5.54224e-06	0.00101757	0.00101673
Mn	0.01477	0.0147693	0.0147698	0.0147701	0.0147703	0.0147707	0.01477	3.63087e-07	2.45826e-05	2.45827e-05
Fe	0.679623	0.679602	0.679616	0.679636	0.679647	0.679675	0.679636	2.10057e-05	3.09073e-05	3.09079e-05
Ni	0.00164188	0.00164062	0.0016415	0.00164184	0.0016424	0.0016433	0.00164186	6.67208e-07	0.000406372	0.000406368
Cu	0.00302457	0.00302303	0.00302341	0.00302386	0.00302435	0.0030247	0.00302389	5.07212e-07	0.000167735	0.000167697
Zn	0	0	0	0	0	0	0	0	0	0
Mo	0	0	0	0	0	0	0	0	0	0
S	0.0309652	0.0308706	0.0309068	0.0309421	0.0309649	0.0310002	0.0309359	3.63006e-05	0.00117341	0.0011723
